# Supplementary material for: Non-isothermal kinetics of spin crossover
Source: Royal Society of Chemistry journal article supplement (doi:10.1039/c7cp03442c), 2017-01-01
Supplement: c7cp03442c1.pdf [file c7cp03442c1.pdf]

*Electronic Supplementary Information*

## **Non-isothermal kinetics of spin crossover**

Mark B. Bushuev, <sup>\*a,b</sup> Elena B. Nikolaenkova<sup>c</sup> and Viktor P. Krivopalov<sup>c</sup>

<sup>a</sup> Nikolaev Institute of Inorganic Chemistry, Siberian Branch of Russian Academy of Sciences, 3, Acad. Lavrentiev Ave., Novosibirsk, 630090, Russia, E-mail: bushuev@niic.nsc.ru, mark.bushuev@gmail.com; Fax: +7 383 330 94 89; Tel: +7 383 316 51 43.

<sup>b</sup> Novosibirsk State University, 2, Pirogova str., Novosibirsk, 630090, Russia.

<sup>c</sup> N. N. Vorozhtsov Novosibirsk Institute of Organic Chemistry, Siberian Branch of Russian Academy of Sciences, 9, Acad. Lavrentiev Ave., Novosibirsk, 630090, Russia.

**Table of contents**

Sample 14-1.....S3

Sample 9 .....S8

Sample 5-1.....S12

Sample 7 .....S18

Sample 3 .....S22

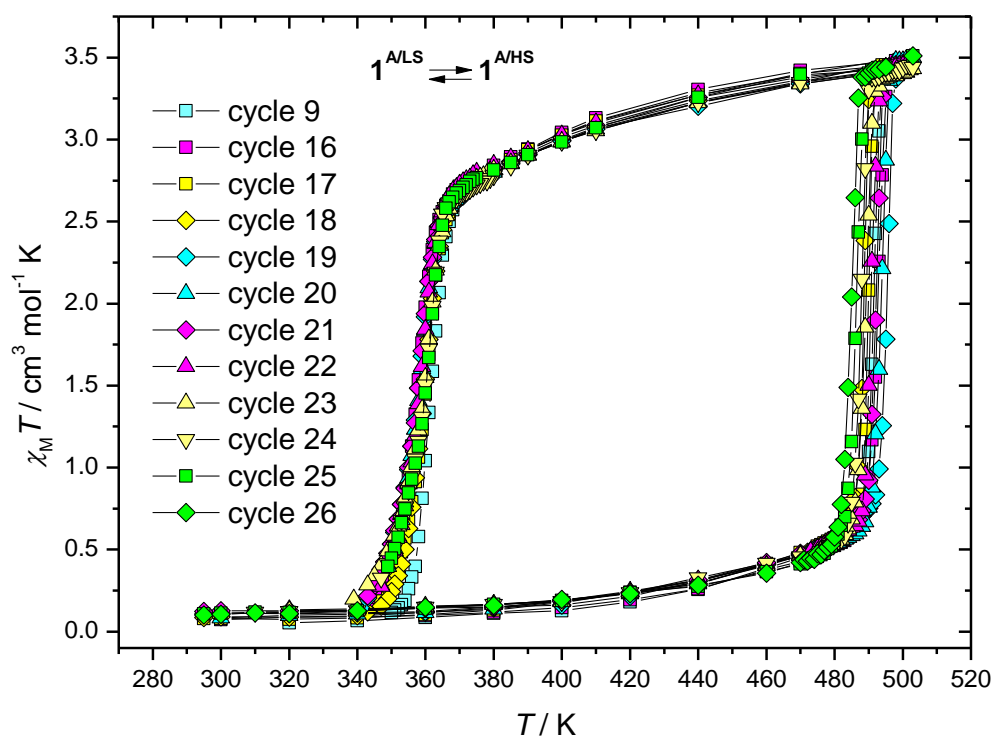

**Fig. S1** Typical thermal cycles  $1^{A/LS} \leftrightarrow 1^{A/HS}$  for the sample **14-1**. Scan rates:  $1 \text{ K min}^{-1}$  (cycles 9, 19 and 20 cyan),  $0.5 \text{ K min}^{-1}$  (cycles 16, 21 and 22, magenta),  $0.25 \text{ K min}^{-1}$  (cycles 17, 18, 23 and 24, yellow),  $0.1 \text{ K min}^{-1}$  (cycles 25 and 26, green). At 460 K (cycle 15, the heating branch) no variation of the magnetic moment was observed for ca. 9 h (M. B. Bushuev, D. P. Pishchur, V. A. Logvinenko, Y. V. Gatilov, I. V. Korolkov, I. K. Shundrina, E. B. Nikolaenkova and V. P. Krivopalov, *Dalton Trans.*, 2016, **45**, 107–120.).

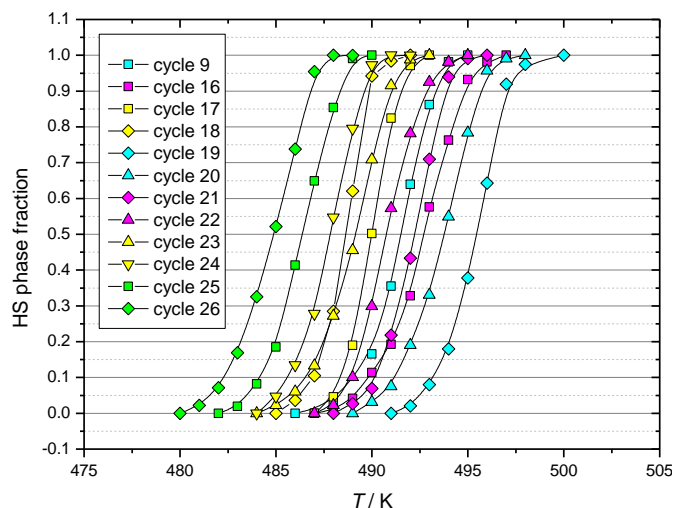

**Fig. S2** The normalized heating branches of the  $\chi_M T$  vs.  $T$  curves for the sample **14-1** (the procedure A was applied to extract the heating branches from the  $\chi_M T$  vs.  $T$  curves). The solid lines are the B-splines.<sup>1</sup>

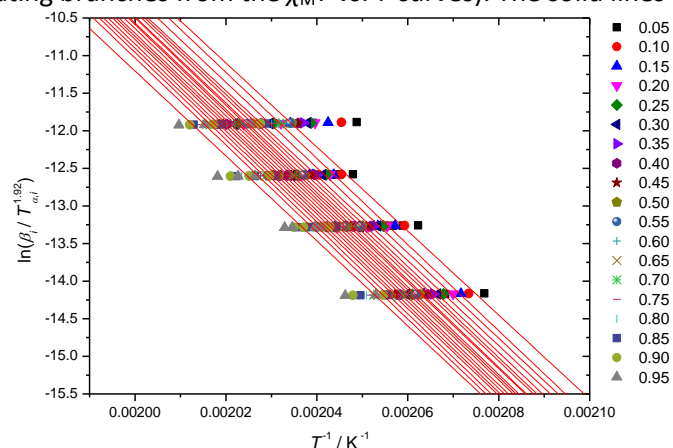

**Fig. S3** The Starink plots for the extent of conversion ( $\alpha$ ) varying from 0.05 up to 0.95 (the sample **14-1**, the procedure A was applied to extract the heating branches from the  $\chi_M T$  vs.  $T$  curves (see Fig S2)).

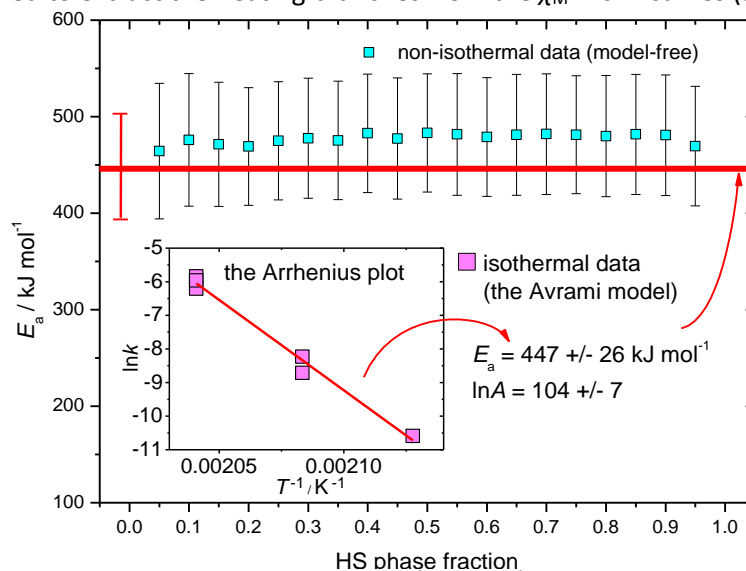

**Fig. S4** Dependency of the activation energy of the  $1^{A/LS} \rightarrow 1^{A/HS}$  transition on the extent of conversion (sample **14-1**, the procedure A was applied to extract the heating branches from the  $\chi_M T$  vs.  $T$  curves (see Fig S2)). The solid red line is the value obtained by the model-fitting method (the Avrami equation) from isothermal data. Inset: the Arrhenius plot of isothermal data.

<sup>1</sup> The splines have been used to connect the experimental points for all of the samples when the procedure A was applied. The isoconversional values of the activation energies in Fig. 5 are the ones obtained using this way of presentation of the normalized heating branches of the spin crossover curves. In some cases we also have tested fitting the normalized heating branches to the Avrami-type equation (see samples **14-1** and **5-1**), but obtained essentially identical estimates of the activation energy.

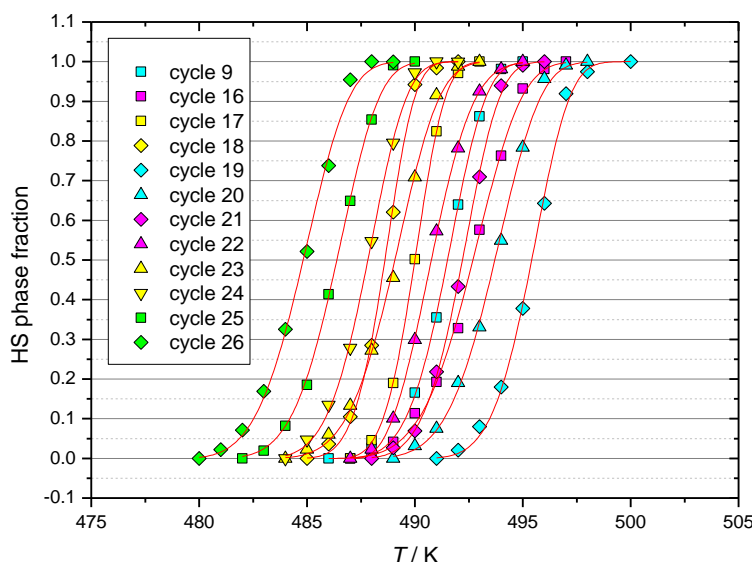

**Fig. S5** The normalized heating branches of the  $\chi_M T$  vs.  $T$  curves for the sample **14-1** (the procedure A was applied to extract the heating branches from the  $\chi_M T$  vs.  $T$  curves). The solid lines are theoretical curves obtained by fitting to the Avrami-type equation,  $\alpha = 1 - \exp(-(k(T - T_0))^n)$ .

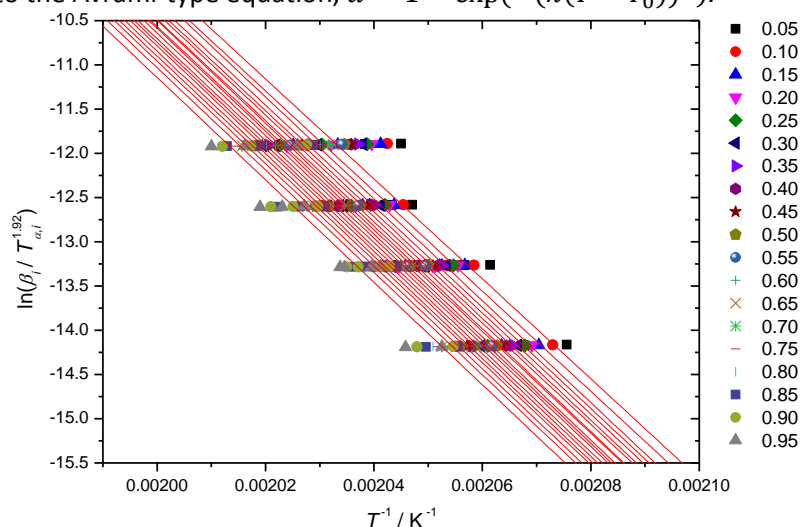

**Fig. S6** The Starink plots for the extent of conversion ( $\alpha$ ) varying from 0.05 up to 0.95 (the sample **14-1**, the procedure A was applied to extract the heating branches from the  $\chi_M T$  vs.  $T$  curves (see Fig S5)).

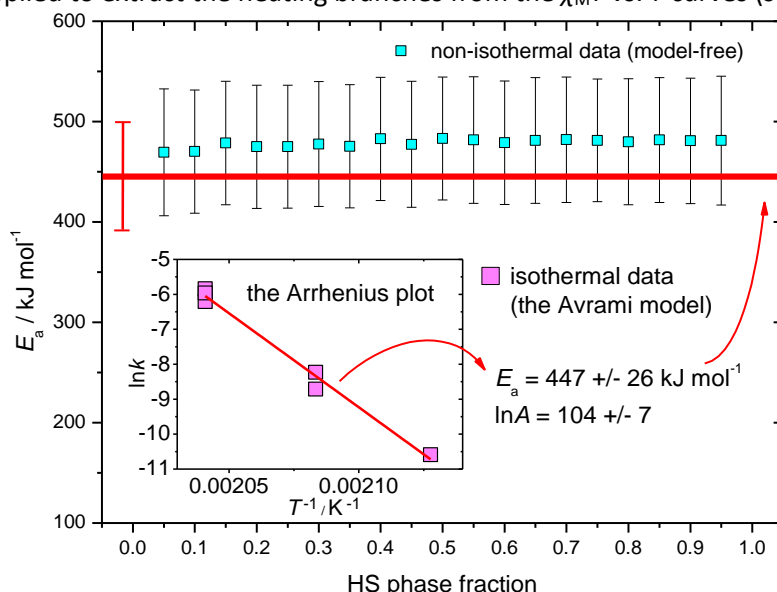

**Fig. S7** Dependency of the activation energy of the  $1^{A/LS} \rightarrow 1^{A/HS}$  transition on the extent of conversion (sample **14-1**, the procedure A was applied to extract the heating branches from the  $\chi_M T$  vs.  $T$  curves (see Fig S5)). The solid red line is the value obtained by the model-fitting method (the Avrami equation) from isothermal data. Inset: the Arrhenius plot of isothermal data.

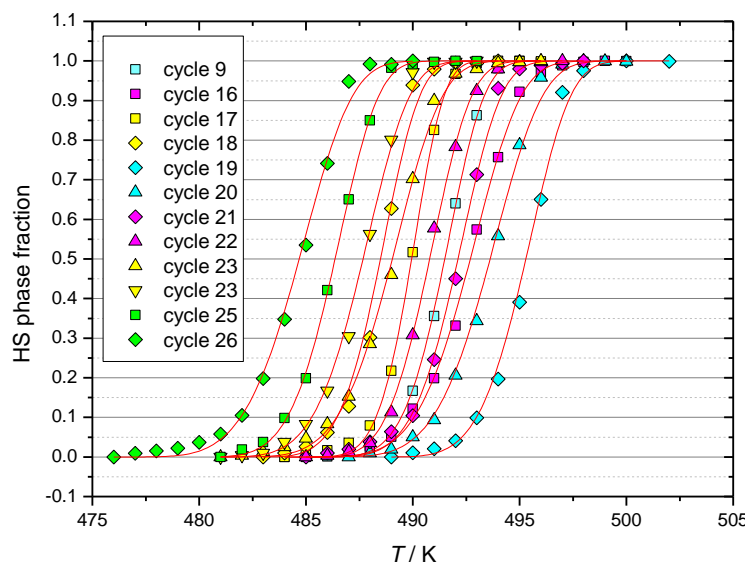

**Fig. S8** The normalized heating branches of the  $\chi_M T$  vs.  $T$  curves for the sample **14-1** (the procedure B was applied to extract the heating branches from the  $\chi_M T$  vs.  $T$  curves). The solid lines are theoretical curves obtained by fitting to the Avrami-type equation,  $\alpha = 1 - \exp(-(k(T - T_0))^n)$ .

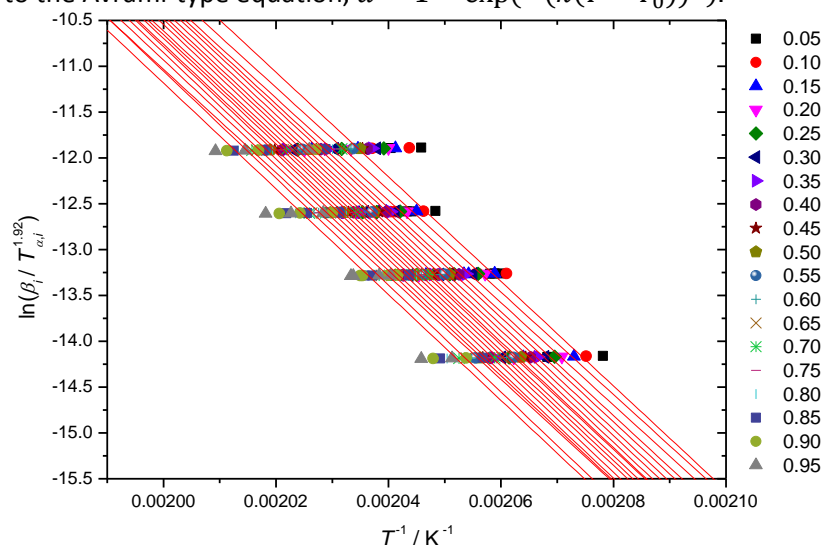

**Fig. S9** The Starink plots for the extent of conversion ( $\alpha$ ) varying from 0.05 up to 0.95 (the sample **14-1**, the procedure B was applied to extract the heating branches from the  $\chi_M T$  vs.  $T$  curves (see Fig S8)).

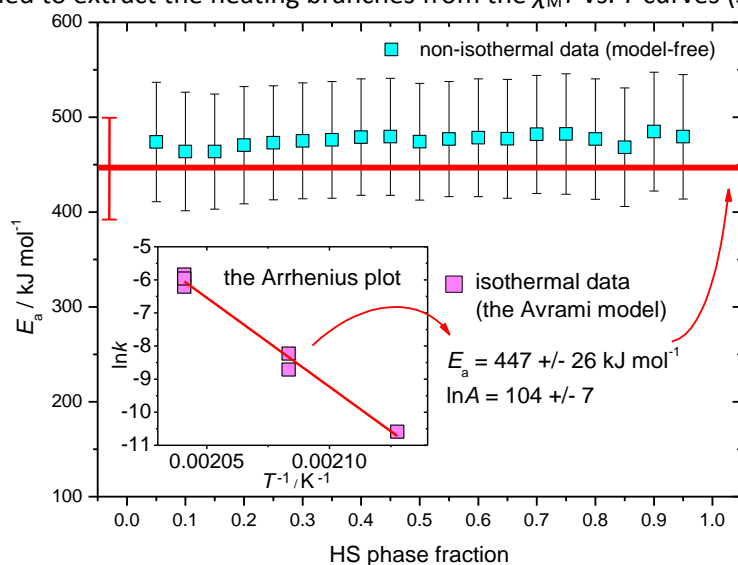

**Fig. S10** Dependency of the activation energy of the  $1^{A/LS} \rightarrow 1^{A/HS}$  transition on the extent of conversion (sample **14-1**, the procedure B was applied to extract the heating branches from the  $\chi_M T$  vs.  $T$  curves (see Fig S8)). The solid red line is the value obtained by the model-fitting method (the Avrami equation) from isothermal data. Inset: the Arrhenius plot of isothermal data.

**Table S1.** Sample **14-1**: Information about thermal cycling, temperatures  $T_c\uparrow$  and  $T_c\downarrow$  (K), hysteresis loop width  $\Delta T$  (K) and kinetic parameters for the LS  $\rightarrow$  HS and the HS  $\rightarrow$  LS transitions (the JMAK model and biexponential approximation). The spin transition temperatures  $T_c\uparrow$  and  $T_c\downarrow$  were determined in “dynamic” experiments by the maximum value of  $d(\chi_M T)/dT$ ; the temperatures at which kinetic measurements have been done are marked by “kin”. The hysteresis loop widths are given only for the cycles when both heating and cooling were done in the non-isothermal mode.

| sample      | cycle     | day   | $T\uparrow$    | $n$  | $k / s^{-1}$          | $T\downarrow$  | $\tau_1 / s$       | $\tau_2 / s$       | $\Delta T$ |
|-------------|-----------|-------|----------------|------|-----------------------|----------------|--------------------|--------------------|------------|
| <b>14</b>   | <b>1</b>  | 1st   | <b>ca. 390</b> |      |                       | <b>370 kin</b> |                    |                    |            |
|             | <b>2</b>  | 1st   | <b>425</b>     |      |                       | <b>372</b>     |                    |                    | <b>53</b>  |
|             | <b>3</b>  | 1st   | <b>402</b>     |      |                       | <b>375</b>     |                    |                    | <b>27</b>  |
|             | <b>4</b>  | 1st   | <b>407</b>     |      |                       | <b>375</b>     |                    |                    | <b>32</b>  |
|             | <b>5</b>  | 134th | <b>401</b>     |      |                       | <b>374</b>     |                    |                    | <b>27</b>  |
|             | <b>6</b>  | 134th | <b>405</b>     |      |                       | <b>375</b>     |                    |                    | <b>30</b>  |
| <b>14-1</b> | <b>7</b>  | 179th | <b>490 kin</b> | 1.85 | $1.26 \times 10^{-4}$ | <b>358</b>     |                    |                    |            |
|             | <b>8</b>  | 180th | <b>490 kin</b> | 2.33 | $2.91 \times 10^{-3}$ | <b>360 kin</b> | $7.46 \times 10^1$ | $8.89 \times 10^2$ |            |
|             | <b>9</b>  | 180th | <b>492</b>     |      |                       | <b>361</b>     |                    |                    | <b>131</b> |
|             | <b>10</b> | 187th | <b>490 kin</b> | 3.20 | $2.02 \times 10^{-3}$ | <b>360 kin</b> | $1.23 \times 10^2$ | $1.12 \times 10^3$ |            |
|             | <b>11</b> | 187th | <b>490 kin</b> | 3.11 | $2.58 \times 10^{-3}$ | <b>360 kin</b> | $1.28 \times 10^2$ | $1.16 \times 10^3$ |            |
|             | <b>12</b> | 242nd | <b>480 kin</b> | 3.72 | $1.64 \times 10^{-4}$ |                |                    |                    |            |
|             | <b>13</b> | 242nd | <b>480 kin</b> | 4.17 | $2.67 \times 10^{-4}$ | <b>362</b>     |                    |                    |            |
|             | <b>14</b> | 256th | <b>470 kin</b> | 4.26 | $2.52 \times 10^{-5}$ |                |                    |                    |            |
|             | <b>15</b> | 263rd | <b>460 kin</b> |      |                       |                |                    |                    |            |
|             | <b>16</b> | 781st | <b>493</b>     |      |                       | <b>359</b>     |                    |                    | <b>134</b> |
|             | <b>17</b> | 782nd | <b>490</b>     |      |                       | <b>361</b>     |                    |                    | <b>129</b> |
|             | <b>18</b> | 795th | <b>489</b>     |      |                       | <b>361</b>     |                    |                    | <b>128</b> |
|             | <b>19</b> | 876th | <b>496</b>     |      |                       | <b>360</b>     |                    |                    | <b>136</b> |
|             | <b>20</b> | 876th | <b>494</b>     |      |                       | <b>360</b>     |                    |                    | <b>134</b> |
|             | <b>21</b> | 885th | <b>492</b>     |      |                       | <b>359</b>     |                    |                    | <b>133</b> |
|             | <b>22</b> | 886th | <b>491</b>     |      |                       | <b>360</b>     |                    |                    | <b>131</b> |
|             | <b>23</b> | 901st | <b>490</b>     |      |                       | <b>360</b>     |                    |                    | <b>130</b> |
|             | <b>24</b> | 902nd | <b>488</b>     |      |                       | <b>361</b>     |                    |                    | <b>127</b> |
|             | <b>25</b> | 907th | <b>487</b>     |      |                       | <b>362</b>     |                    |                    | <b>125</b> |
|             | <b>26</b> | 908th | <b>486</b>     |      |                       |                |                    |                    |            |

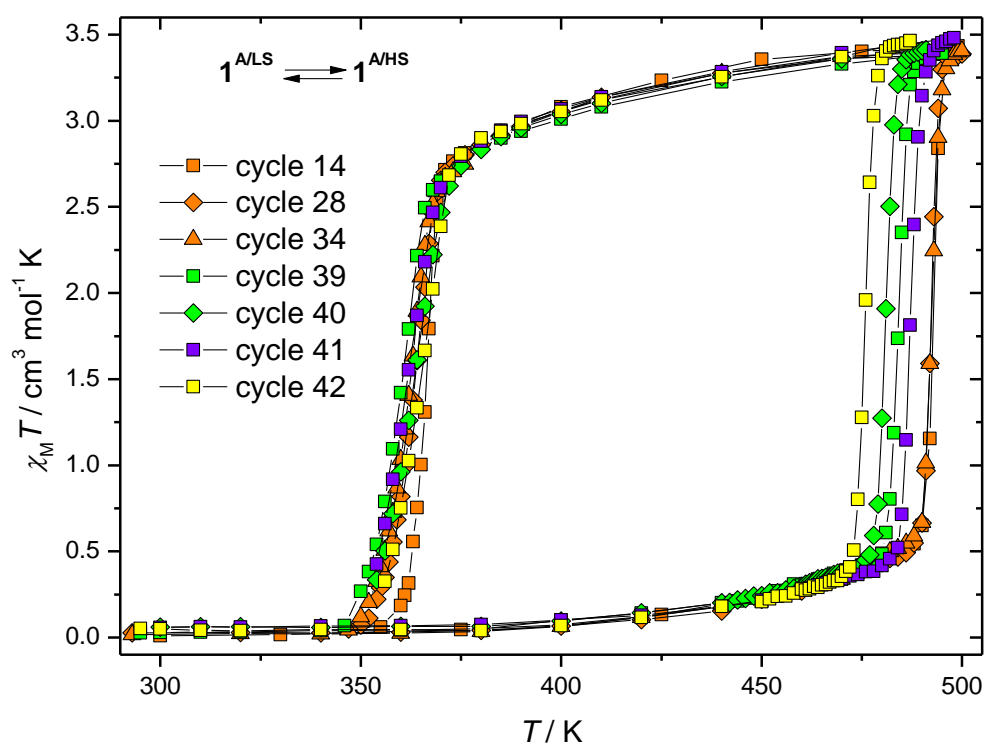

**Fig. S11** Typical thermal cycles  $1^{A/LS} \leftrightarrow 1^{A/HS}$  for the sample 9. Scan rates: 0.9 K min<sup>-1</sup> (cycles 14, 28 and 34 orange), 0.5 K min<sup>-1</sup> (cycle 41, blue), 0.1 K min<sup>-1</sup> (cycles 39 and 40, green), 0.05 K min<sup>-1</sup> (cycle 42, yellow).



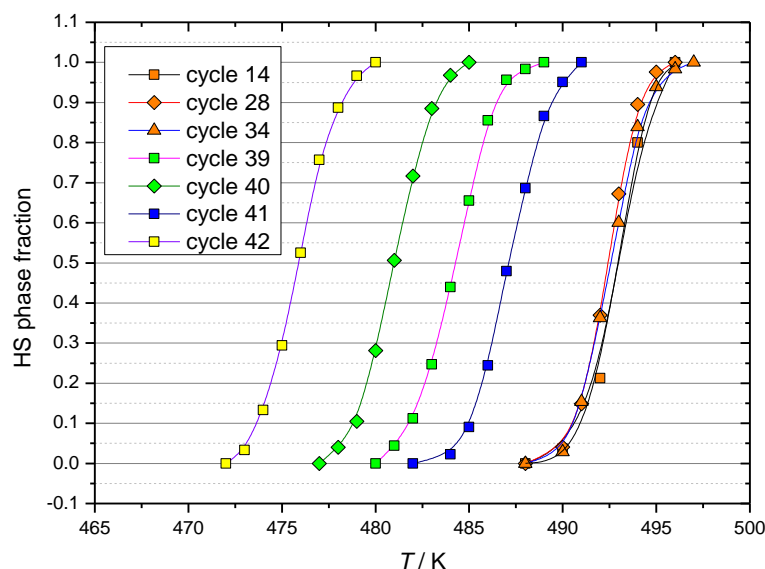

**Fig. S12** The normalized heating branches of the  $\chi_M T$  vs.  $T$  curves for the sample **9** (the procedure A was applied to extract the heating branches from the  $\chi_M T$  vs.  $T$  curves). The solid lines are the B-splines.

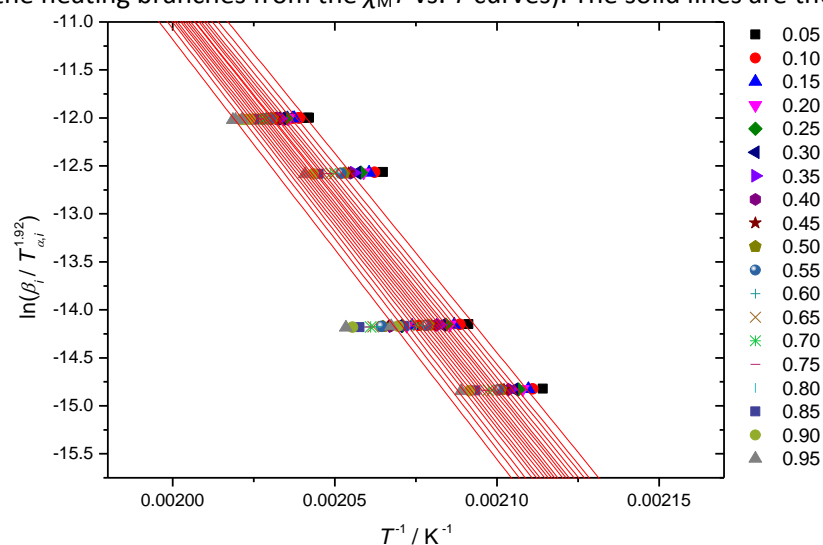

**Fig. S13** The Starink plots for the extent of conversion ( $\alpha$ ) varying from 0.05 up to 0.95 (the sample **9**, the procedure A was applied to extract the heating branches from the  $\chi_M T$  vs.  $T$  curves (see Fig S12)).

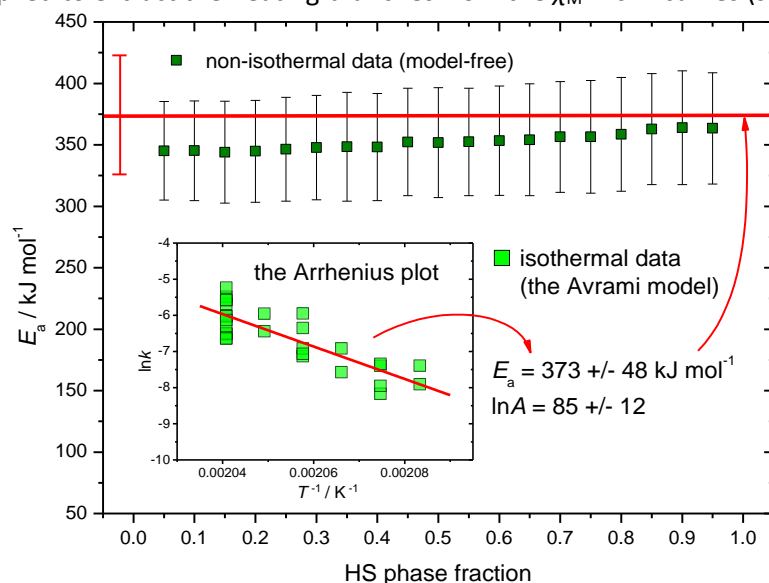

**Fig. S14** Dependency of the activation energy of the  $1^{A/LS} \rightarrow 1^{A/HS}$  transition on the extent of conversion (sample **9**, the procedure A was applied to extract the heating branches from the  $\chi_M T$  vs.  $T$  curves (see Fig S12)). The solid red line is the value obtained by the model-fitting method (the Avrami equation) from isothermal data. Inset: the Arrhenius plot of isothermal data.

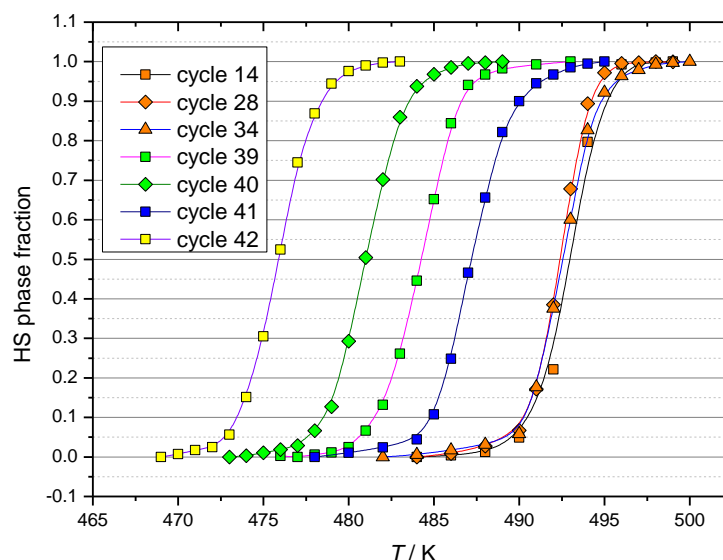

**Fig. S15** The normalized heating branches of the  $\chi_M T$  vs.  $T$  curves for the sample 9 (the procedure B was applied to extract the heating branches from the  $\chi_M T$  vs.  $T$  curves). The solid lines are the B-splines.

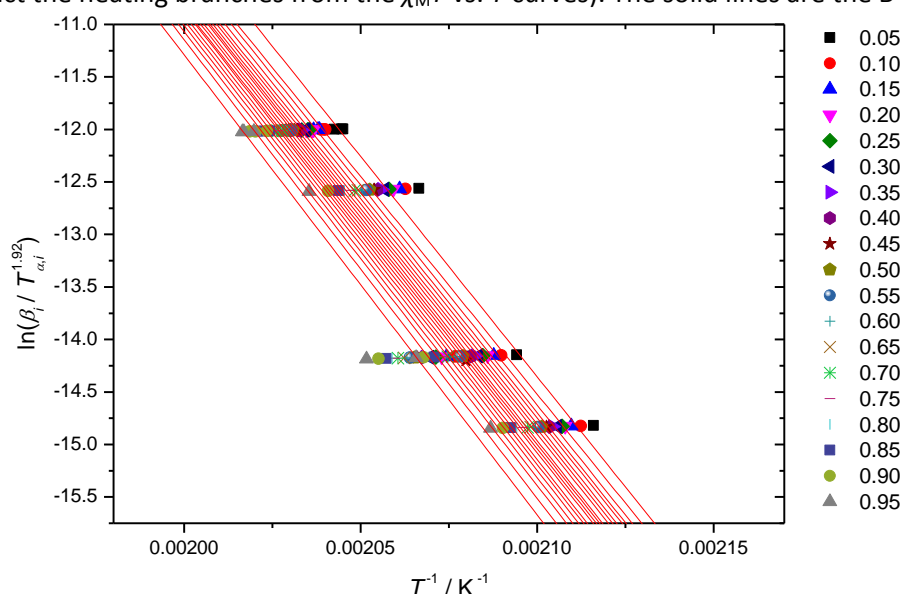

**Fig. S16** The Starink plots for the extent of conversion ( $\alpha$ ) varying from 0.05 up to 0.95 (the sample 9, the procedure B was applied to extract the heating branches from the  $\chi_M T$  vs.  $T$  curves (see Fig S15)).

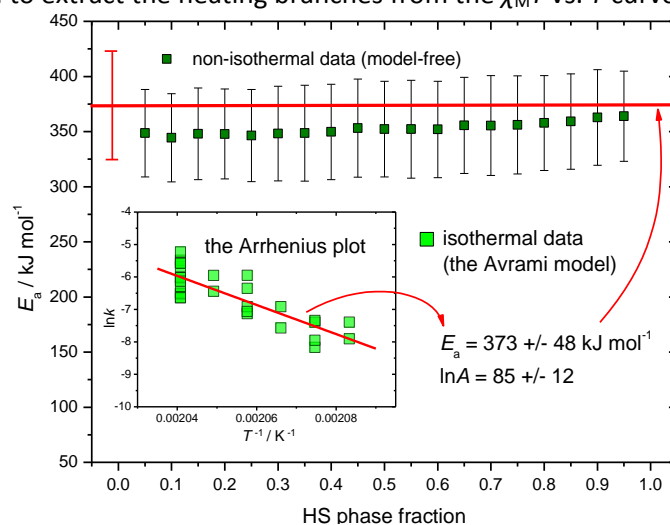

**Fig. S17** Dependency of the activation energy of the  $1^{A/LS} \rightarrow 1^{A/HS}$  transition on the extent of conversion (sample 9, the procedure B was applied to extract the heating branches from the  $\chi_M T$  vs.  $T$  curves (see Fig S15)). The solid red line is the value obtained by the model-fitting method (the Avrami equation) from isothermal data. Inset: the Arrhenius plot of isothermal data.

**Table S2.** Sample 9: Information about thermal cycling, temperatures  $T_c\uparrow$  and  $T_c\downarrow$  (K), hysteresis loop width  $\Delta T$  (K) and kinetic parameters for the LS  $\rightarrow$  HS (the JMAK model) and the HS  $\rightarrow$  LS transitions (biexponential approximation). The spin transition temperatures  $T_c\uparrow$  and  $T_c\downarrow$  were determined in “dynamic” experiments by the maximum value of  $d(\chi_M T)/dT$ ; the temperatures at which kinetic measurements have been done are marked by “kin”. The hysteresis loop widths are given only for the cycles when both heating and cooling were done in the non-isothermal mode.

| sample | cycle | day    | $T\uparrow$ | $n$  | $k / s^{-1}$          | $T\downarrow$ | $\tau_1$           | $\tau_2$           | $\Delta T$ |
|--------|-------|--------|-------------|------|-----------------------|---------------|--------------------|--------------------|------------|
| 5      | 1     | 1st    | ca. 450     |      |                       | 350           |                    |                    |            |
|        | 2     | 2nd    | 494 kin     | 2.20 | $5.63 \times 10^{-4}$ | 365 kin       |                    |                    |            |
|        | 3     | 2nd    | 490 kin     | 2.37 | $3.40 \times 10^{-3}$ | 372           |                    |                    |            |
|        | 4     | 8th    | 492 kin     | 3.16 | $1.03 \times 10^{-3}$ | 370 kin       | $5.61 \times 10^1$ | $1.47 \times 10^3$ |            |
|        | 5     | 9th    | 492 kin     | 3.30 | $9.40 \times 10^{-4}$ | 367           |                    |                    |            |
|        | 6     | 116th  | 492 kin     | 2.77 | $1.12 \times 10^{-3}$ | 370 kin       | $3.07 \times 10^1$ | $1.12 \times 10^3$ |            |
|        | 7     | 117th  | 492 kin     | 3.67 | $1.51 \times 10^{-3}$ | 370 kin       | $3.64 \times 10^1$ | $1.18 \times 10^3$ |            |
|        | 8     | 117th  | 492 kin     | 2.45 | $4.07 \times 10^{-3}$ | 370 kin       | $4.37 \times 10^1$ | $9.74 \times 10^2$ |            |
|        | 9     | 117th  | 490 kin     | 2.26 | $4.15 \times 10^{-3}$ | 370 kin       | $5.07 \times 10^1$ | $1.01 \times 10^3$ |            |
|        | 10    | 118th  | 490 kin     | 3.50 | $1.31 \times 10^{-3}$ | 370 kin       | $2.31 \times 10^2$ | $1.86 \times 10^3$ |            |
|        | 11    | 118th  | 490 kin     | 2.44 | $3.78 \times 10^{-3}$ | 370 kin       | $3.87 \times 10^1$ | $9.40 \times 10^2$ |            |
|        | 12    | 123rd  | 490 kin     | 3.98 | $1.47 \times 10^{-3}$ | 370 kin       | $9.43 \times 10^1$ | $1.46 \times 10^3$ |            |
|        | 13    | 123rd  | 490 kin     | 3.56 | $2.42 \times 10^{-3}$ | 370 kin       | $8.24 \times 10^1$ | $1.59 \times 10^3$ |            |
|        | 14    | 171st  | 494         |      |                       | 367           |                    |                    | 127        |
|        | 15    | 173rd  | 490 kin     | 3.63 | $1.50 \times 10^{-3}$ | 370 kin       | $6.53 \times 10^2$ | $5.54 \times 10^3$ |            |
|        | 16    | 173rd  | 490 kin     | 3.05 | $3.80 \times 10^{-3}$ | 367 kin       | $4.96 \times 10^1$ | $9.76 \times 10^2$ |            |
|        | 17    | 173rd  | 490 kin     | 2.91 | $5.35 \times 10^{-3}$ | 368 kin       | $2.89 \times 10^1$ | $9.38 \times 10^2$ |            |
|        | 18    | 174th  | 490 kin     | 3.51 | $1.85 \times 10^{-3}$ | 368 kin       | $1.67 \times 10^2$ | $2.19 \times 10^3$ |            |
|        | 19    | 174th  | 490 kin     | 3.28 | $2.42 \times 10^{-3}$ | 368 kin       |                    |                    |            |
|        | 20    | 175th  | 486 kin     | 3.52 | $8.00 \times 10^{-4}$ | 366 kin       | $3.21 \times 10^1$ | $1.32 \times 10^3$ |            |
|        | 21    | 175th  | 486 kin     | 3.14 | $9.91 \times 10^{-4}$ | 366 kin       | $7.03 \times 10^1$ | $1.95 \times 10^3$ |            |
|        | 22    | 203th  | 490 kin     | 3.00 | $1.30 \times 10^{-3}$ | 370 kin       | $1.21 \times 10^2$ | $3.23 \times 10^3$ |            |
|        | 23    | 203th  | 490 kin     | 2.40 | $2.18 \times 10^{-3}$ | 370 kin       | $3.26 \times 10^1$ | $1.87 \times 10^3$ |            |
|        | 24    | 208th  | 482 kin     | 3.71 | $2.83 \times 10^{-4}$ | 366 kin       | $5.65 \times 10^1$ | $1.61 \times 10^3$ |            |
|        | 25    | 208th  | 482 kin     | 2.75 | $6.14 \times 10^{-4}$ | 366 kin       | $3.02 \times 10^1$ | $1.26 \times 10^3$ |            |
|        | 26    | 211th  | 488 kin     | 1.80 | $1.60 \times 10^{-3}$ | 366 kin       | $4.78 \times 10^1$ | $1.60 \times 10^3$ |            |
|        | 27    | 211th  | 488 kin     | 1.75 | $2.60 \times 10^{-3}$ | 366 kin       | $3.38 \times 10^1$ | $2.24 \times 10^3$ |            |
|        | 28    | 327th  | 493         |      |                       | 364           |                    |                    | 129        |
|        | 29    | 373rd  | 486 kin     | 2.75 | $8.55 \times 10^{-4}$ | 366 kin       | $5.77 \times 10^1$ | $1.89 \times 10^3$ |            |
|        | 30    | 373rd  | 486 kin     | 1.80 | $1.75 \times 10^{-3}$ | 366 kin       | $3.79 \times 10^1$ | $1.63 \times 10^3$ |            |
|        | 31    | 373rd  | 486 kin     | 1.69 | $2.61 \times 10^{-3}$ | 366 kin       |                    |                    |            |
|        | 32    | 450th  | 482 kin     | 3.20 | $3.53 \times 10^{-4}$ | 370 kin       | $5.90 \times 10^1$ | $5.82 \times 10^3$ |            |
|        | 33    | 450th  | 482 kin     | 2.16 | $6.49 \times 10^{-4}$ | 370 kin       | $5.93 \times 10^1$ | $2.95 \times 10^3$ |            |
|        | 34    | 491st  | 493         | 2.75 |                       | 363           |                    |                    | 130        |
|        | 35    | 527th  | 484 kin     | 2.50 | $5.14 \times 10^{-4}$ | 370 kin       | $3.20 \times 10^1$ | $5.34 \times 10^3$ |            |
|        | 36    | 527th  | 484 kin     | 2.21 | $9.92 \times 10^{-4}$ | 370 kin       |                    |                    |            |
|        | 37    | 533rd  | 480 kin     | 2.77 | $3.68 \times 10^{-4}$ | 370 kin       | $4.70 \times 10^1$ | $2.39 \times 10^3$ |            |
|        | 38    | 533rd  | 480 kin     | 2.25 | $6.17 \times 10^{-4}$ | 370 kin       | $8.20 \times 10^1$ | $4.12 \times 10^3$ |            |
|        | 39    | 1217th | 484         |      |                       | 362           |                    |                    | 122        |
|        | 40    | 1219th | 481         |      |                       | 364           |                    |                    | 117        |
|        | 41    | 1225th | 487         |      |                       | 362           |                    |                    | 125        |
|        | 42    | 1226th | 476         |      |                       | 368           |                    |                    | 108        |

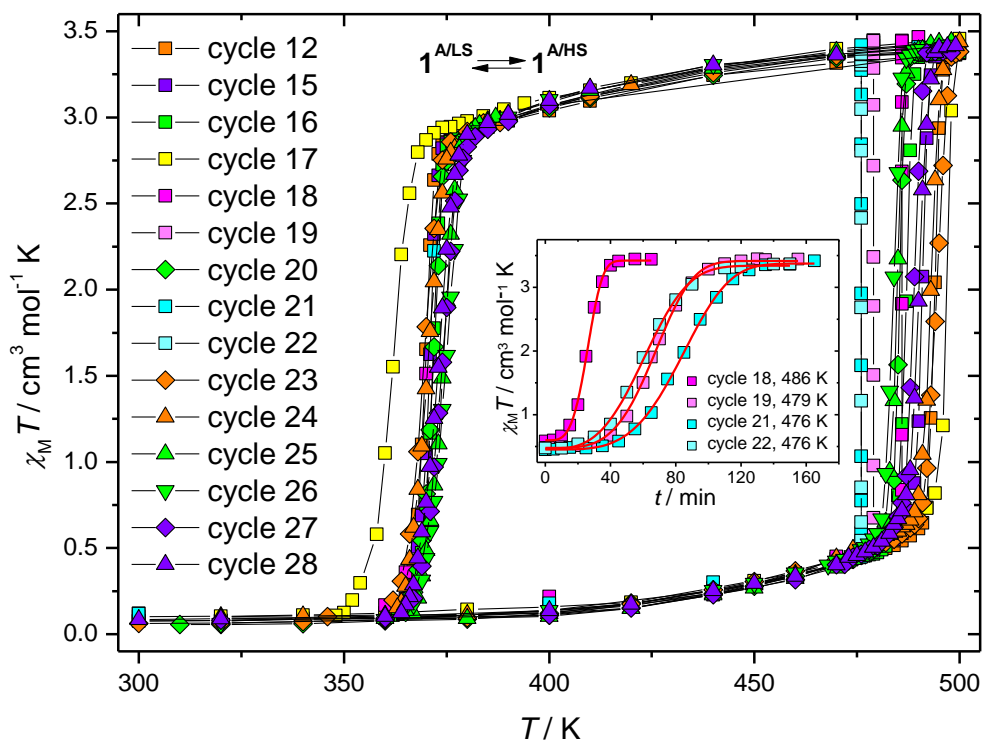

**Fig. S18** Typical thermal cycles  $1^{A/LS} \leftrightarrow 1^{A/HS}$  for the sample **5-1**. Scan rates:  $2 \text{ K min}^{-1}$  (cycle 17, yellow),  $1 \text{ K min}^{-1}$  (cycles 23 and 24, orange),  $0.9 \text{ K min}^{-1}$  (cycle 12, orange),  $0.5 \text{ K min}^{-1}$  (cycles 27 and 28, violet),  $0.4 \text{ K min}^{-1}$  (cycle 15, violet),  $0.25 \text{ K min}^{-1}$  (cycles 16, 20, 25 and 26, green).

After *ca.* 1.5. years of ageing the sample **5-1** demonstrated wider hysteresis loop (cycle 17) than in preceding thermal cycles (compare with thermal cycles 12, 15 and 16) (Fig. S18). However, on further thermal cycling, the cooling branches of the  $\chi_M T$  vs.  $T$  curves showed a good agreement with earlier magnetic cycles (Fig. S18).

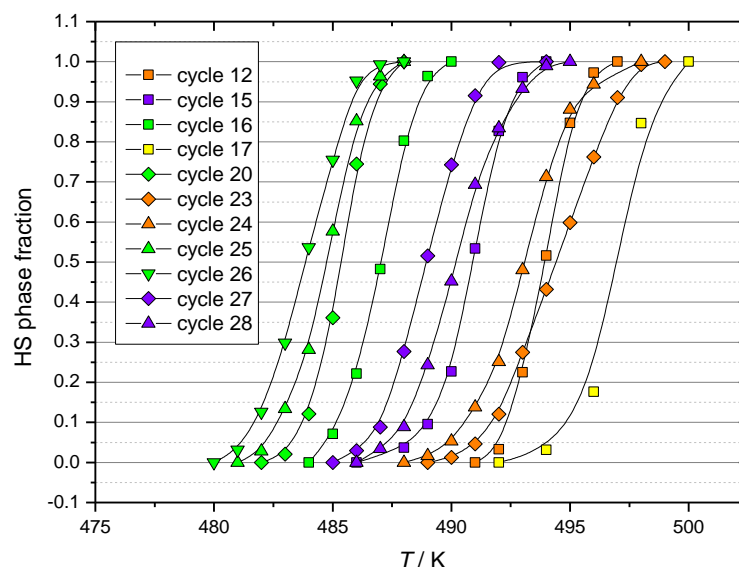

**Fig. S19** The normalized heating branches of the  $\chi_M T$  vs.  $T$  curves for the sample **5-1** (the procedure A was applied to extract the heating branches from the  $\chi_M T$  vs.  $T$  curves). The solid lines are the B-splines.

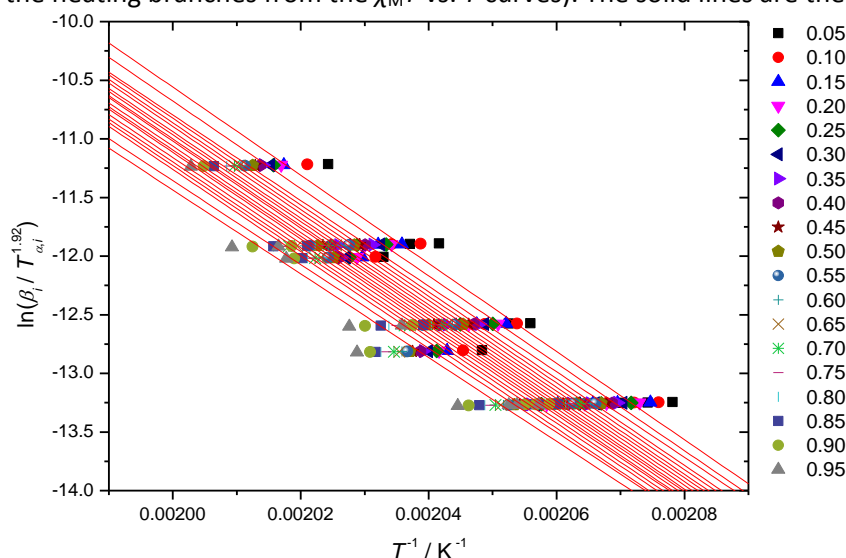

**Fig. S20** The Starink plots for the extent of conversion ( $\alpha$ ) varying from 0.05 up to 0.95 (the sample **5-1**, the procedure A was applied to extract the heating branches from the  $\chi_M T$  vs.  $T$  curves (see Fig S19)).

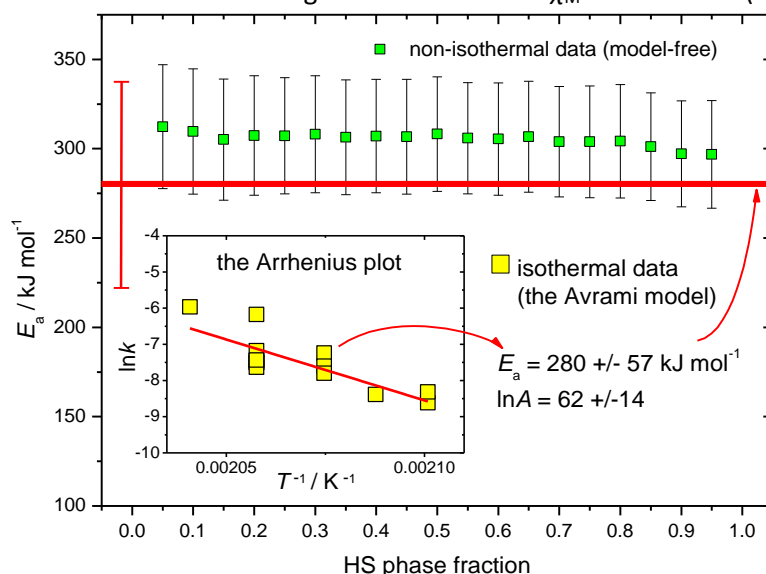

**Fig. S21** Dependency of the activation energy of the  $1^{A/LS} \rightarrow 1^{A/HS}$  transition on the extent of conversion (sample **5-1**, the procedure A was applied to extract the heating branches from the  $\chi_M T$  vs.  $T$  curves (see Fig S19)). The solid red line is the value obtained by the model-fitting method (the Avrami equation) from isothermal data. Inset: the Arrhenius plot of isothermal data.

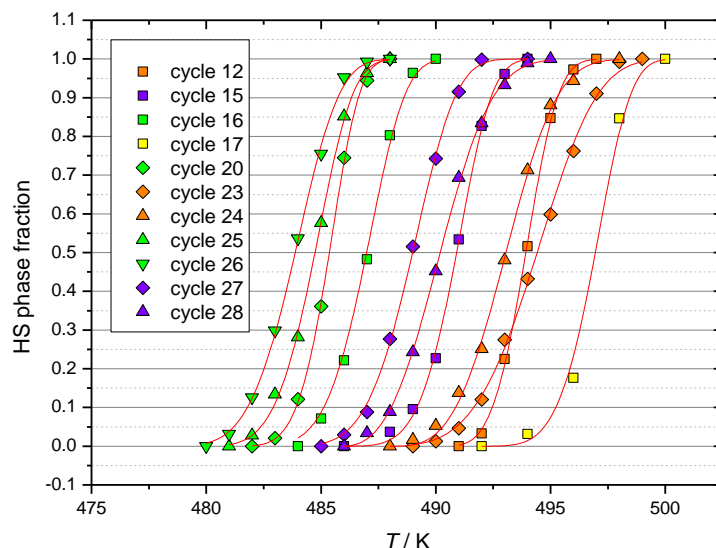

**Fig. S22** The normalized heating branches of the  $\chi_M T$  vs.  $T$  curves for the sample **5-1** (the procedure A was applied to extract the heating branches from the  $\chi_M T$  vs.  $T$  curves). The solid lines are theoretical curves obtained by fitting to the Avrami-type equation,  $\alpha = 1 - \exp(-(k(T - T_0))^n)$ .

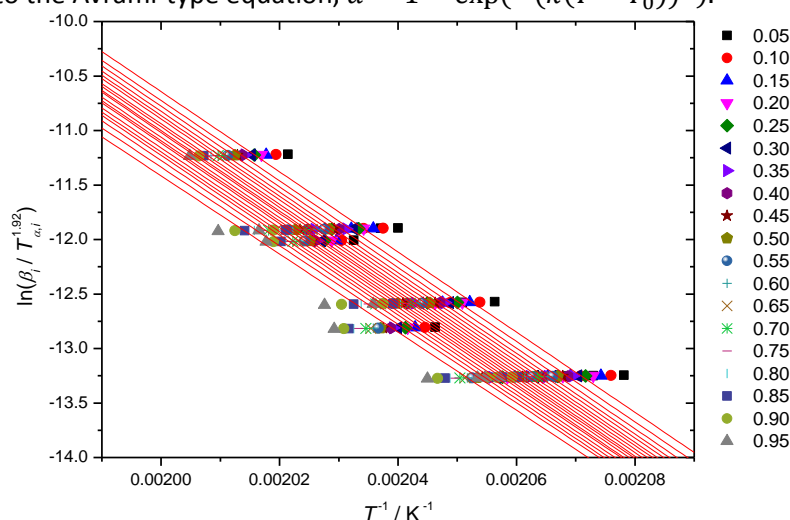

**Fig. S23** The Starink plots for the extent of conversion ( $\alpha$ ) varying from 0.05 up to 0.95 (the sample **5-1**, the procedure A was applied to extract the heating branches from the  $\chi_M T$  vs.  $T$  curves (see Fig S22)).

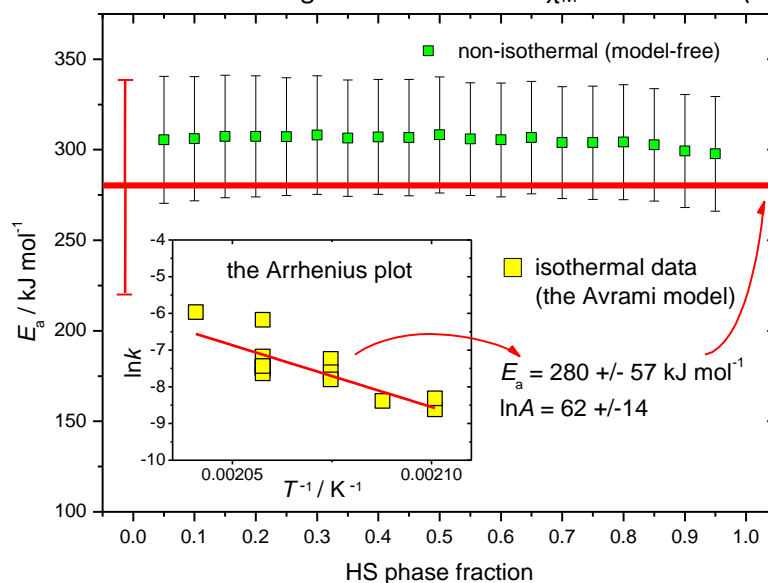

**Fig. S24** Dependency of the activation energy of the  $1^{A/LS} \rightarrow 1^{A/HS}$  transition on the extent of conversion (sample **5-1**, the procedure A was applied to extract the heating branches from the  $\chi_M T$  vs.  $T$  curves (see Fig S22)). The solid red line is the value obtained by the model-fitting method (the Avrami equation) from isothermal data. Inset: the Arrhenius plot of isothermal data.

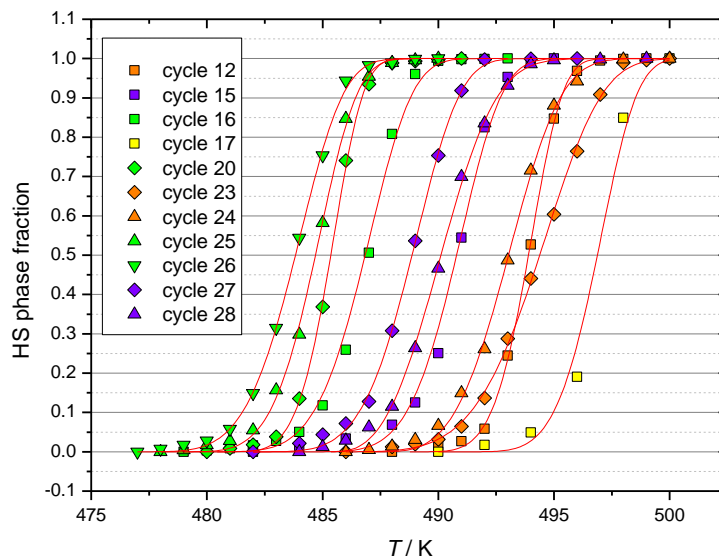

**Fig. S25** The normalized heating branches of the  $\chi_M T$  vs.  $T$  curves for the sample **5-1** (the procedure B was applied to extract the heating branches from the  $\chi_M T$  vs.  $T$  curves). The solid lines are theoretical curves obtained by fitting to the Avrami-type equation,  $\alpha = 1 - \exp(-(k(T - T_0))^n)$ .

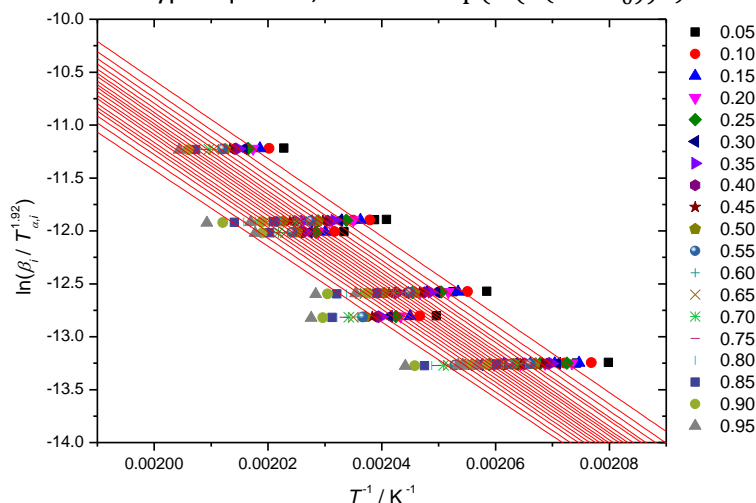

**Fig. S26** The Starink plots for the extent of conversion ( $\alpha$ ) varying from 0.05 up to 0.95 (the sample **5-1**, the procedure B was applied to extract the heating branches from the  $\chi_M T$  vs.  $T$  curves (see Fig S25)).

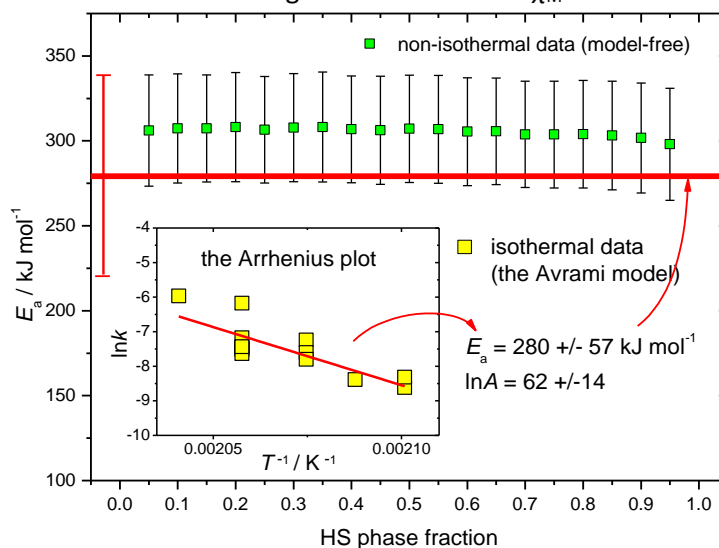

**Fig. S27** Dependency of the activation energy of the  $1^{A/LS} \rightarrow 1^{A/HS}$  transition on the extent of conversion (sample **5-1**, the procedure B was applied to extract the heating branches from the  $\chi_M T$  vs.  $T$  curves (see Fig S25)). The solid red line is the value obtained by the model-fitting method (the Avrami equation) from isothermal data. Inset: the Arrhenius plot of isothermal data.

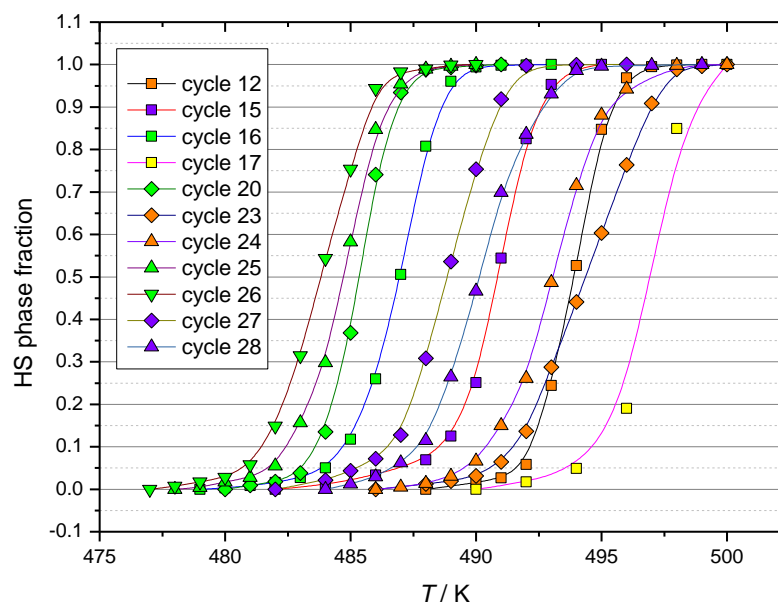

**Fig. S28** The normalized heating branches of the  $\chi_M T$  vs.  $T$  curves for the sample **5-1** (the procedure B was applied to extract the heating branches from the  $\chi_M T$  vs.  $T$  curves). The solid lines are the B-splines.

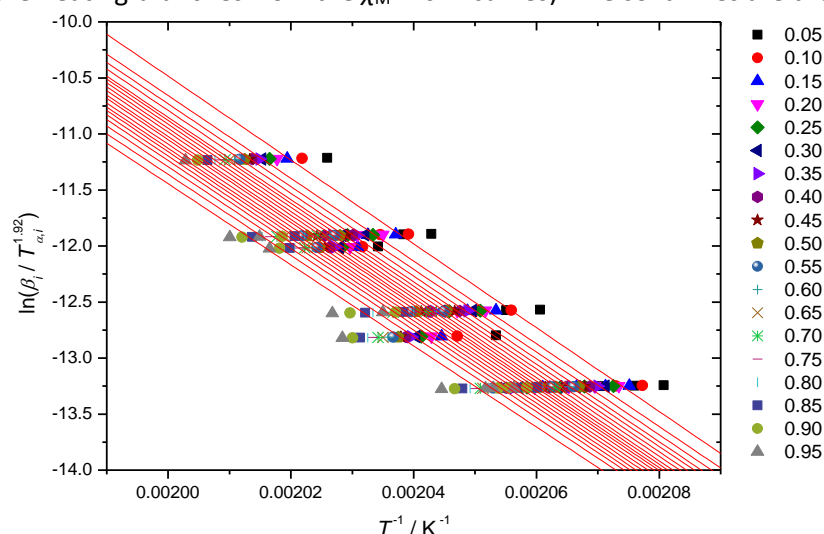

**Fig. S29** The Starink plots for the extent of conversion ( $\alpha$ ) varying from 0.05 up to 0.95 (the sample **5-1**, the procedure B was applied to extract the heating branches from the  $\chi_M T$  vs.  $T$  curves (see Fig S28)).

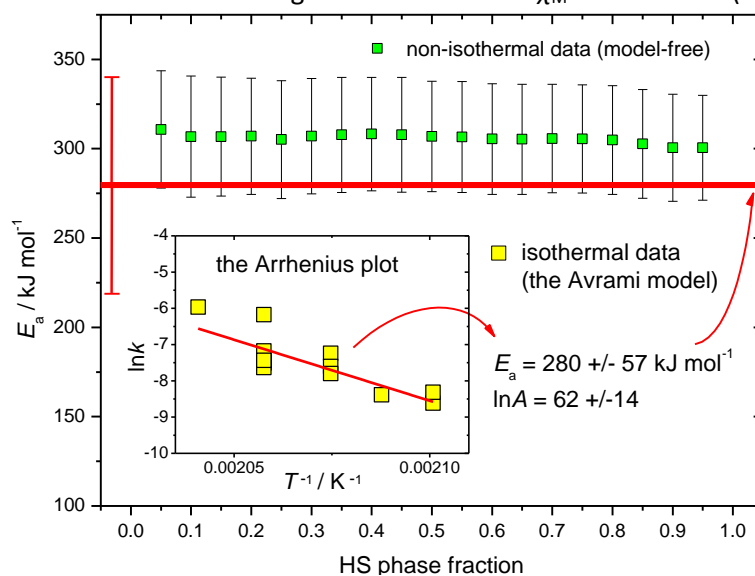

**Fig. S30** Dependency of the activation energy of the  $1^{A/LS} \rightarrow 1^{A/HS}$  transition on the extent of conversion (sample **5-1**, the procedure B was applied to extract the heating branches from the  $\chi_M T$  vs.  $T$  curves (see Fig. S28)). The solid red line is the value obtained by the model-fitting method (the Avrami equation) from isothermal data. Inset: the Arrhenius plot of isothermal data.



**Table S3.** Sample 5-1: Information about thermal cycling, temperatures  $T_c\uparrow$  and  $T_c\downarrow$  (K), hysteresis loop width  $\Delta T$  (K) and kinetic parameters for the LS  $\rightarrow$  HS and the HS  $\rightarrow$  LS transitions (the JMAK model and biexponential approximation). The spin transition temperatures  $T_c\uparrow$  and  $T_c\downarrow$  were determined in “dynamic” experiments by the maximum value of  $d(\chi_M T)/dT$ ; the temperatures at which kinetic measurements have been done are marked by “kin”. The hysteresis loop widths are given only for the cycles when both heating and cooling were done in the non-isothermal mode.

| sample     | cycle     | day    | $T\uparrow$    | $n$  | $k / s^{-1}$          | $T\downarrow$  | $\tau_1 / s$       | $\tau_2 / s$       | $\Delta T$ |
|------------|-----------|--------|----------------|------|-----------------------|----------------|--------------------|--------------------|------------|
| <b>5</b>   | <b>1</b>  | 1st    | <b>ca. 440</b> |      |                       | <b>ca. 320</b> |                    |                    |            |
|            | <b>2</b>  | 18th   | <b>ca. 320</b> |      |                       | <b>ca. 320</b> |                    |                    |            |
| <b>5-1</b> | <b>3</b>  | 23rd   | <b>493</b>     |      |                       | <b>353</b>     |                    |                    | <b>140</b> |
|            | <b>4</b>  | 25th   | <b>490 kin</b> | 2.16 | $2.57 \times 10^{-3}$ | <b>370 kin</b> |                    | $6.26 \times 10^3$ |            |
|            | <b>5</b>  | 26th   | <b>486 kin</b> | 2.09 | $2.08 \times 10^{-3}$ | <b>366 kin</b> | $3.30 \times 10^2$ | $2.89 \times 10^3$ |            |
|            | <b>6</b>  | 26th   | <b>482 kin</b> | 3.15 | $7.17 \times 10^{-4}$ | <b>370</b>     |                    |                    |            |
|            | <b>7</b>  | 28th   | <b>482 kin</b> | 3.51 | $4.98 \times 10^{-4}$ | <b>370</b>     |                    |                    |            |
|            | <b>8</b>  | 28th   | <b>482 kin</b> | 3.82 | $4.10 \times 10^{-4}$ | <b>370</b>     |                    |                    |            |
|            | <b>9</b>  | 131st  | <b>486 kin</b> | 3.77 | $5.48 \times 10^{-4}$ | <b>373 kin</b> | $5.19 \times 10^1$ | $4.88 \times 10^2$ |            |
|            | <b>10</b> | 131st  | <b>486 kin</b> | 3.92 | $7.64 \times 10^{-4}$ | <b>373 kin</b> | $9.35 \times 10^1$ | $1.07 \times 10^3$ |            |
|            | <b>11</b> | 131st  | <b>486 kin</b> | 3.99 | $5.49 \times 10^{-4}$ | <b>373 kin</b> |                    |                    |            |
|            | <b>12</b> | 168th  | <b>494</b>     |      |                       | <b>370</b>     |                    |                    | <b>124</b> |
|            | <b>13</b> | 309th  | <b>486 kin</b> | 4.00 | $5.84 \times 10^{-4}$ | <b>373 kin</b> | $1.96 \times 10^2$ | $1.50 \times 10^3$ |            |
|            | <b>14</b> | 309th  | <b>486 kin</b> | 3.65 | $4.84 \times 10^{-4}$ | <b>373 kin</b> | $2.39 \times 10^2$ | $1.67 \times 10^3$ |            |
|            | <b>15</b> | 388th  | <b>491</b>     |      |                       | <b>371</b>     |                    |                    | <b>120</b> |
|            | <b>16</b> | 393rd  | <b>487</b>     |      |                       | <b>372</b>     |                    |                    | <b>115</b> |
|            | <b>17</b> | 905th  | <b>497</b>     |      |                       | <b>361</b>     |                    |                    | <b>136</b> |
|            | <b>18</b> | 906th  | <b>486 kin</b> | 3.99 | $5.90 \times 10^{-4}$ |                |                    |                    |            |
|            | <b>19</b> | 906th  | <b>479 kin</b> | 4.05 | $2.28 \times 10^{-4}$ |                |                    |                    |            |
|            | <b>20</b> | 921st  | <b>485</b>     |      |                       | <b>373</b>     |                    |                    | <b>112</b> |
|            | <b>21</b> | 997th  | <b>476 kin</b> | 4.10 | $1.82 \times 10^{-4}$ |                |                    |                    |            |
|            | <b>22</b> | 997th  | <b>476 kin</b> | 3.26 | $2.45 \times 10^{-4}$ |                |                    |                    |            |
|            | <b>23</b> | 1024th | <b>495</b>     |      |                       | <b>370</b>     |                    |                    | <b>125</b> |
|            | <b>24</b> | 1024th | <b>493</b>     |      |                       | <b>370</b>     |                    |                    | <b>123</b> |
|            | <b>25</b> | 1031st | <b>485</b>     |      |                       | <b>375</b>     |                    |                    | <b>110</b> |
|            | <b>26</b> | 1032nd | <b>484</b>     |      |                       | <b>375</b>     |                    |                    | <b>109</b> |
|            | <b>27</b> | 1038th | <b>489</b>     |      |                       | <b>375</b>     |                    |                    | <b>114</b> |
|            | <b>28</b> | 1039th | <b>490</b>     |      |                       | <b>374</b>     |                    |                    | <b>116</b> |

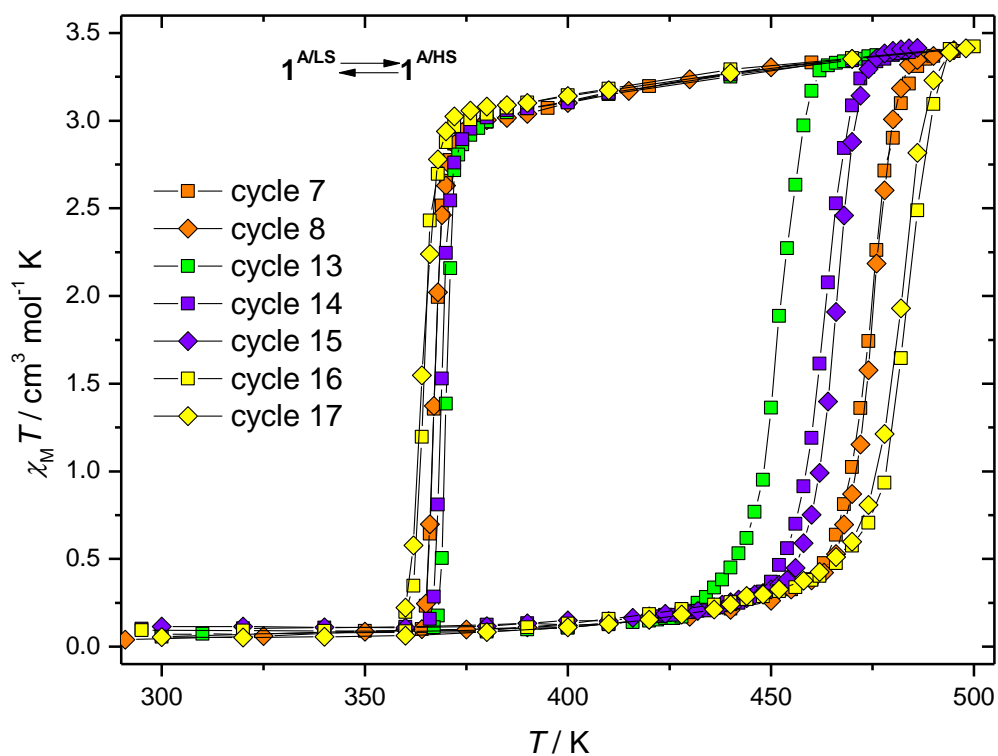

**Fig. S31** Typical thermal cycles  $1^{A/LS} \leftrightarrow 1^{A/HS}$  for the sample 7. Scan rates:  $2 \text{ K min}^{-1}$  (cycles 16 and 17, yellow),  $0.9 \text{ K min}^{-1}$  (cycles 7 and 8, orange),  $0.5 \text{ K min}^{-1}$  (cycles 14 and 15, blue),  $0.25 \text{ K min}^{-1}$  (cycle 13, green).

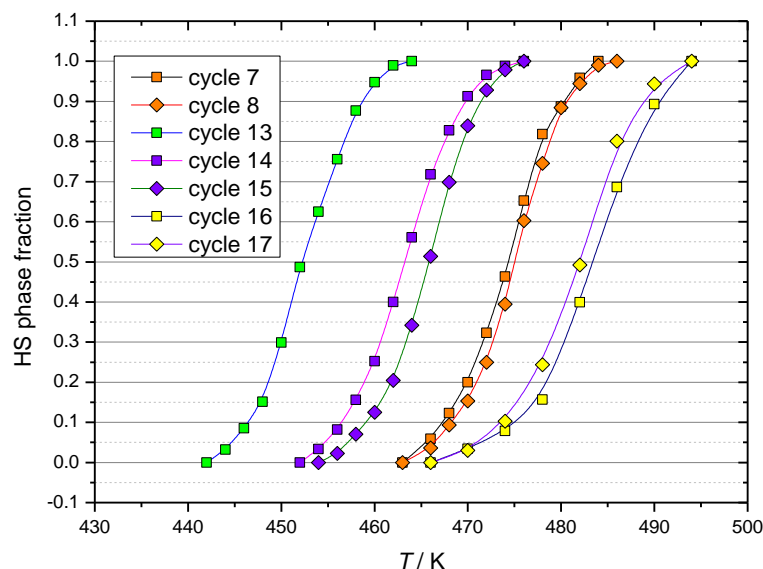

**Fig. S32** The normalized heating branches of the  $\chi_M T$  vs.  $T$  curves for the sample **7** (the procedure A was applied to extract the heating branches from the  $\chi_M T$  vs.  $T$  curves). The solid lines are the B-splines.

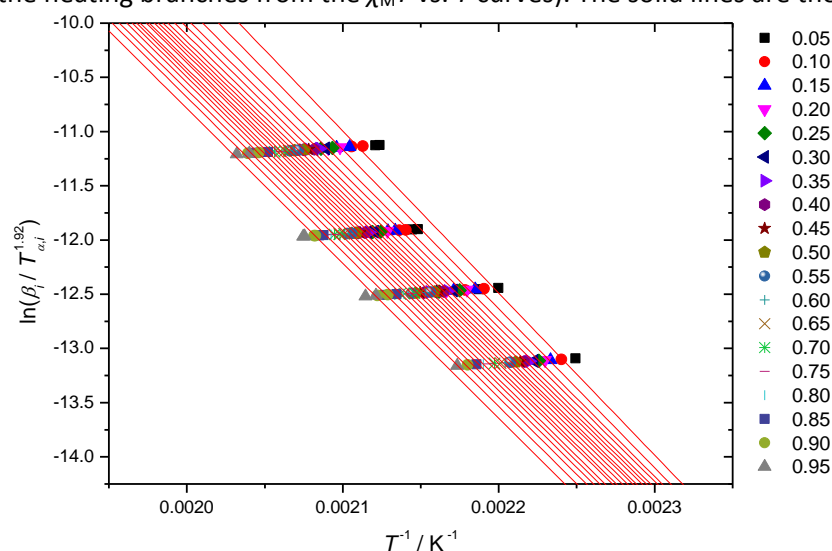

**Fig. S33** The Starink plots for the extent of conversion ( $\alpha$ ) varying from 0.05 up to 0.95 (the sample **7**, the procedure A was applied to extract the heating branches from the  $\chi_M T$  vs.  $T$  curves (see Fig S32)).

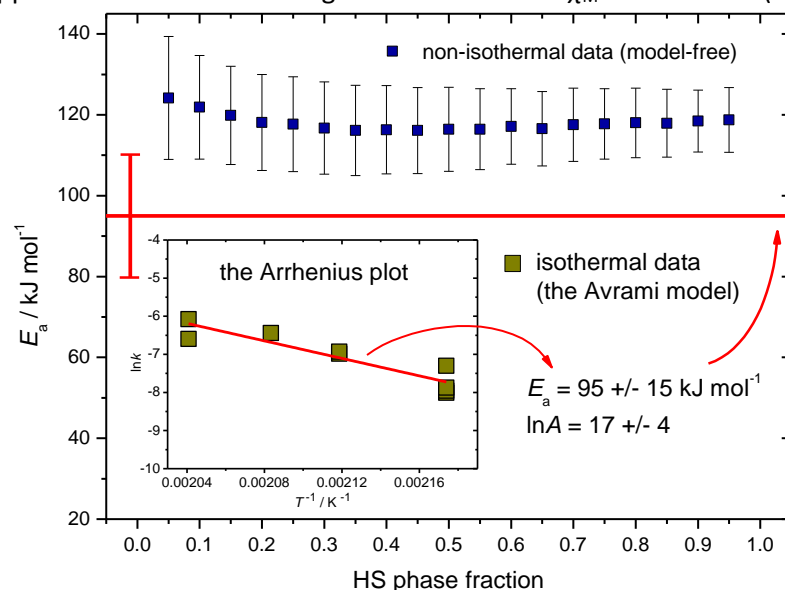

**Fig. S34** Dependency of the activation energy of the  $1^{A/LS} \rightarrow 1^{A/HS}$  transition on the extent of conversion (sample **7**, the procedure A was applied to extract the heating branches from the  $\chi_M T$  vs.  $T$  curves (see Fig S32)). The solid red line is the value obtained by the model-fitting method (the Avrami equation) from isothermal data. Inset: the Arrhenius plot of isothermal data.

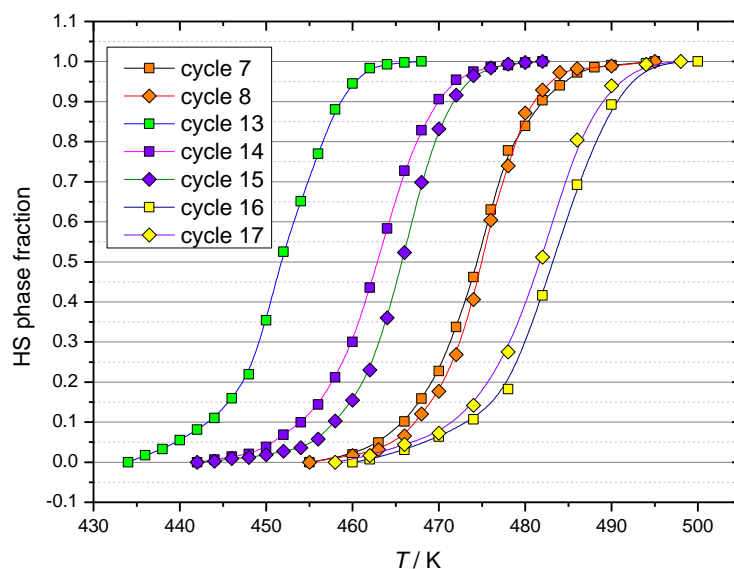

**Fig. S35** The normalized heating branches of the  $\chi_M T$  vs.  $T$  curves for the sample **7** (the procedure B was applied to extract the heating branches from the  $\chi_M T$  vs.  $T$  curves). The solid lines are the B-splines.

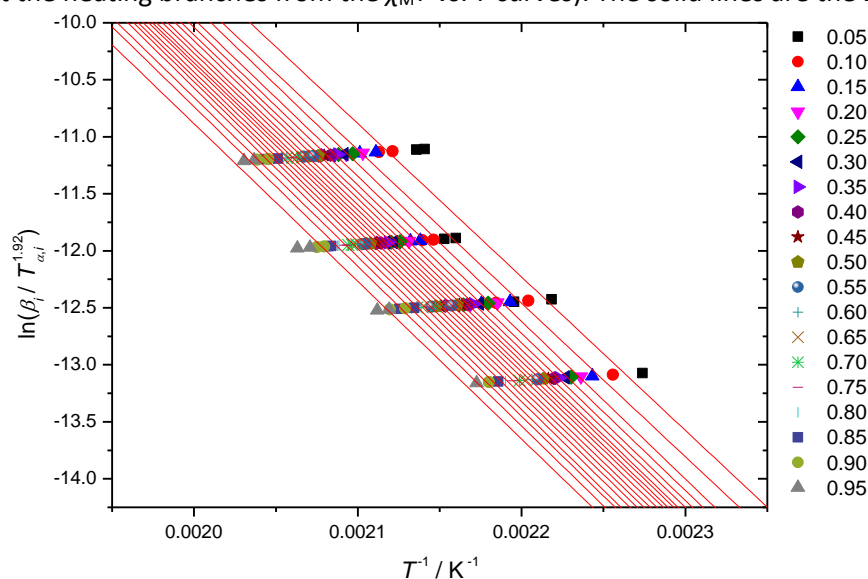

**Fig. S36** The Starink plots for the extent of conversion ( $\alpha$ ) varying from 0.05 up to 0.95 (the sample **7**, the procedure B was applied to extract the heating branches from the  $\chi_M T$  vs.  $T$  curves (see Fig S35)).

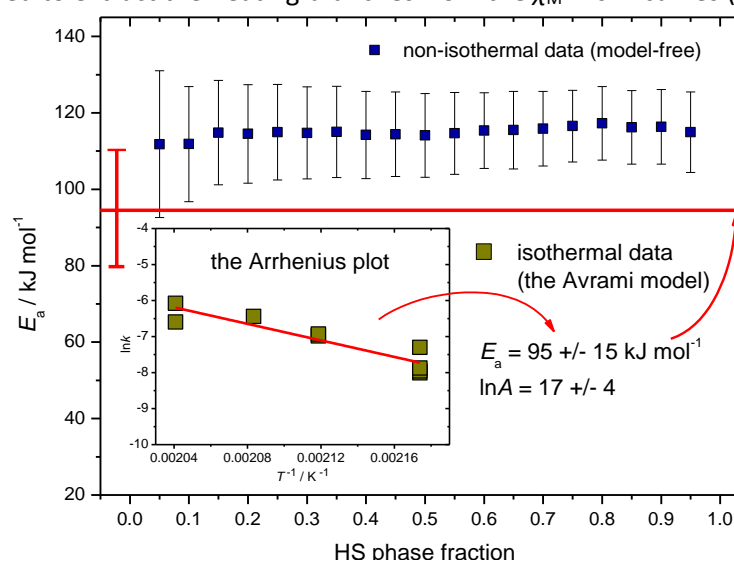

**Fig. S37** Dependency of the activation energy of the  $1^{A/LS} \rightarrow 1^{A/HS}$  transition on the extent of conversion (sample **7**, the procedure B was applied to extract the heating branches from the  $\chi_M T$  vs.  $T$  curves (see Fig S35)). The solid red line is the value obtained by the model-fitting method (the Avrami equation) from isothermal data. Inset: the Arrhenius plot of isothermal data.

**Table S4.** Sample **7**: Information about thermal cycling, temperatures  $T_c\uparrow$  and  $T_c\downarrow$  (K), hysteresis loop width  $\Delta T$  (K) and kinetic parameters for the LS  $\rightarrow$  HS and the HS  $\rightarrow$  LS transitions (the JMAK model). The spin transition temperatures  $T_c\uparrow$  and  $T_c\downarrow$  were determined in “dynamic” experiments by the maximum value of  $d(\chi_M T)/dT$ ; the temperatures at which kinetic measurements have been done are marked by “kin”. The hysteresis loop widths are given only for the cycles when both heating and cooling were done in the non-isothermal mode.

| sample   | cycle     | day    | $T\uparrow$    | $n$  | $k / s^{-1}$          | $T\downarrow$  | $n$  | $k / s^{-1}$          | $\Delta T$ |
|----------|-----------|--------|----------------|------|-----------------------|----------------|------|-----------------------|------------|
| <b>7</b> | <b>1</b>  | 1st    | -              |      |                       | <b>360 kin</b> | 1.56 | $9.45 \times 10^{-4}$ |            |
|          | <b>2</b>  | 1st    | <b>490 kin</b> | 2.37 | $1.37 \times 10^{-3}$ | <b>363 kin</b> | 1.87 | $6.24 \times 10^{-3}$ |            |
|          | <b>3</b>  | 1st    | <b>490 kin</b> | 1.87 | $2.30 \times 10^{-3}$ | <b>365 kin</b> | 2.82 | $3.65 \times 10^{-3}$ |            |
|          | <b>4</b>  | 3rd    | <b>480 kin</b> | 2.09 | $1.59 \times 10^{-3}$ | <b>370 kin</b> | 2.58 | $1.42 \times 10^{-3}$ |            |
|          | <b>5</b>  | 4th    | <b>472 kin</b> | 2.52 | $9.26 \times 10^{-4}$ | <b>372 kin</b> | 1.35 | $1.20 \times 10^{-3}$ |            |
|          | <b>6</b>  | 4th    | <b>472 kin</b> | 2.32 | $9.79 \times 10^{-4}$ | <b>370 kin</b> | 1.56 | $3.18 \times 10^{-3}$ |            |
|          | <b>7</b>  | 11th   | <b>476</b>     |      |                       | <b>367</b>     |      |                       | <b>109</b> |
|          | <b>8</b>  | 12th   | <b>475</b>     |      |                       | <b>367</b>     |      |                       | <b>108</b> |
|          | <b>9</b>  | 13th   | <b>460 kin</b> | 1.97 | $6.77 \times 10^{-4}$ | <b>373 kin</b> | 1.42 | $1.72 \times 10^{-4}$ |            |
|          | <b>10</b> | 13th   | <b>460 kin</b> | 2.14 | $3.33 \times 10^{-4}$ | <b>371 kin</b> | 2.16 | $4.07 \times 10^{-4}$ |            |
|          | <b>11</b> | 210th  | <b>460 kin</b> | 2.19 | $3.51 \times 10^{-4}$ | <b>370 kin</b> | 2.34 | $4.41 \times 10^{-3}$ |            |
|          | <b>12</b> | 210th  | <b>460 kin</b> | 2.27 | $3.81 \times 10^{-4}$ | <b>370 kin</b> | 2.50 | $3.59 \times 10^{-3}$ |            |
|          | <b>13</b> | 1058th | <b>450</b>     |      |                       | <b>370</b>     |      |                       | <b>80</b>  |
|          | <b>14</b> | 1063rd | <b>464</b>     |      |                       | <b>369</b>     |      |                       | <b>95</b>  |
|          | <b>15</b> | 1091st | <b>466</b>     |      |                       | -              |      |                       |            |
|          | <b>16</b> | 1092nd | <b>482</b>     |      |                       | <b>364</b>     |      |                       | <b>118</b> |
|          | <b>17</b> | 1093rd | <b>482</b>     |      |                       | <b>364</b>     |      |                       | <b>118</b> |

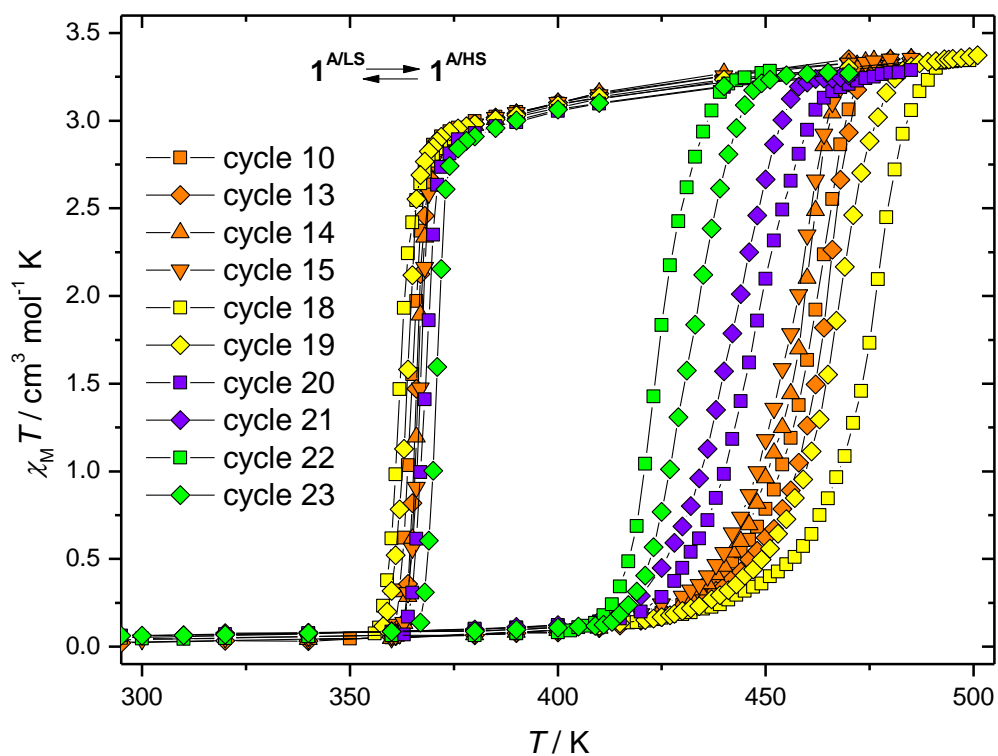

**Fig. S38** Typical thermal cycles  $1^{A/LS} \leftrightarrow 1^{A/HS}$  for the sample **3**. Scan rates:  $2 \text{ K min}^{-1}$  (cycles 18 and 19, yellow),  $0.9 \text{ K min}^{-1}$  (cycles 10, 13, 14 and 15, orange),  $0.5 \text{ K min}^{-1}$  (cycles 21 and 22, blue),  $0.25 \text{ K min}^{-1}$  (cycles 22 and 23, green).

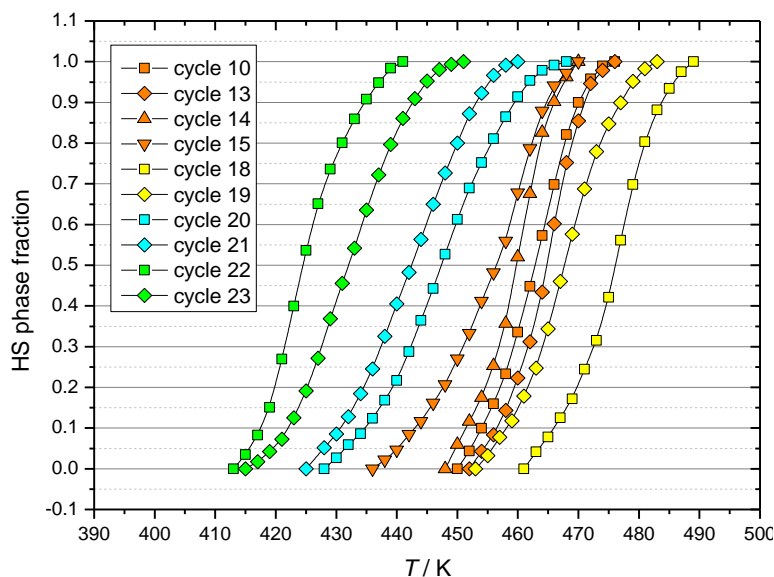

**Fig. S39** The normalized heating branches of the  $\chi_M T$  vs.  $T$  curves for the sample **3** (the procedure A was applied to extract the heating branches from the  $\chi_M T$  vs.  $T$  curves). The solid lines are the B-splines.

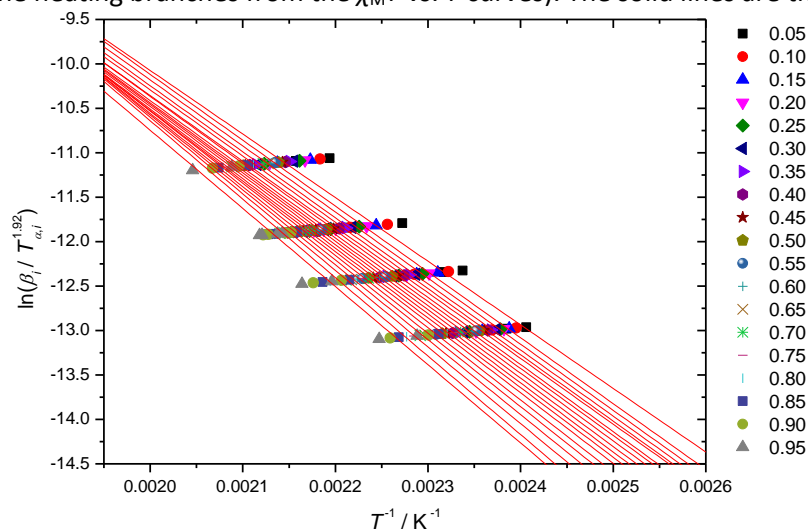

**Fig. S40** The Starink plots for the extent of conversion ( $\alpha$ ) varying from 0.05 up to 0.95 (the sample **3**, the procedure A was applied to extract the heating branches from the  $\chi_M T$  vs.  $T$  curves (see Fig S39)).

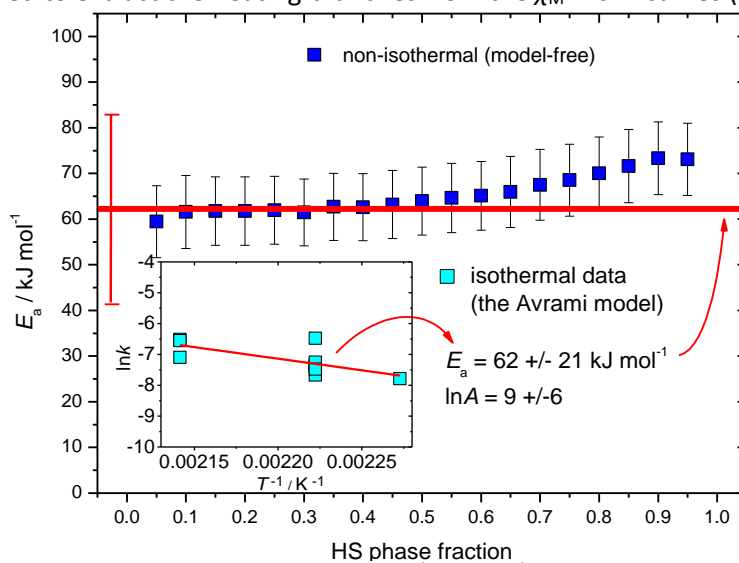

**Fig. S41** Dependency of the activation energy of the  $1^{A/LS} \rightarrow 1^{A/HS}$  transition on the extent of conversion (sample **3**, the procedure A was applied to extract the heating branches from the  $\chi_M T$  vs.  $T$  curves (see Fig S39)). The solid red line is the value obtained by the model-fitting method (the Avrami equation) from isothermal data. Inset: the Arrhenius plot of isothermal data.

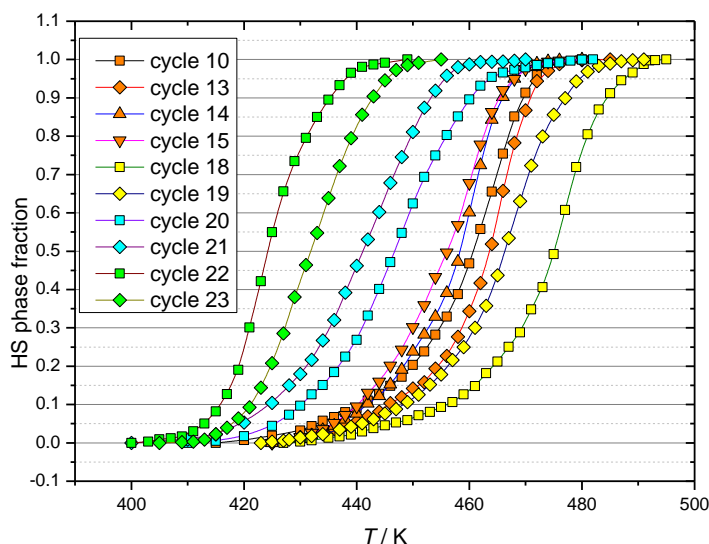

**Fig. S42** The normalized heating branches of the  $\chi_M T$  vs.  $T$  curves for the sample **3** (the procedure B was applied to extract the heating branches from the  $\chi_M T$  vs.  $T$  curves). The solid lines are the B-splines.

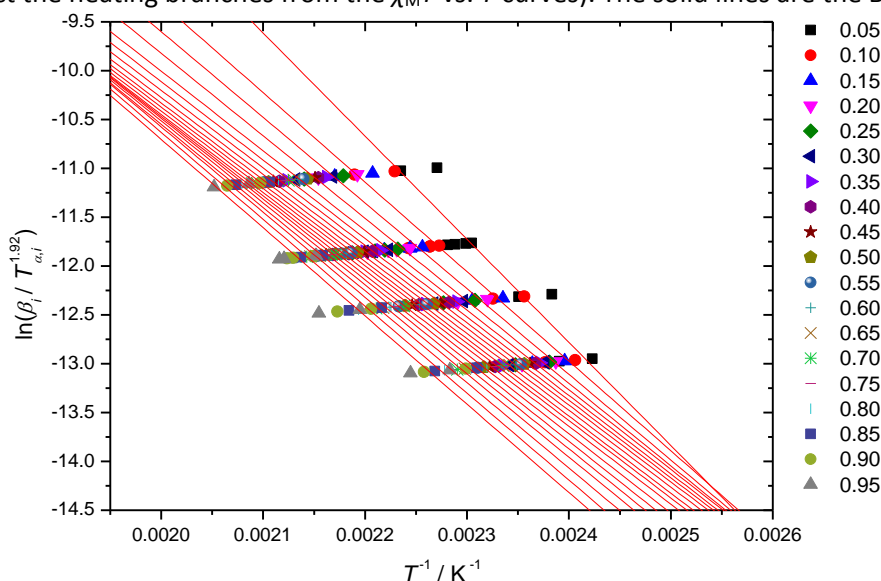

**Fig. S43** The Starink plots for the extent of conversion ( $\alpha$ ) varying from 0.05 up to 0.95 (the sample **3**, the procedure B was applied to extract the heating branches from the  $\chi_M T$  vs.  $T$  curves (see Fig S39)).

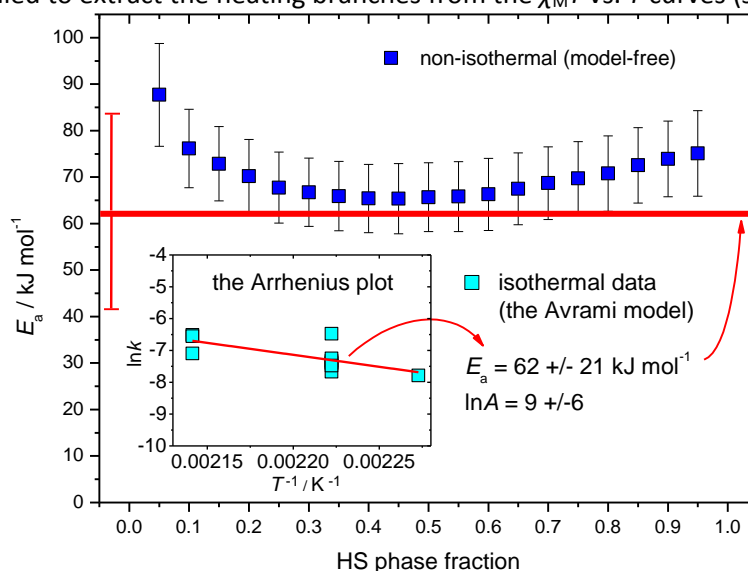

**Fig. S44** Dependency of the activation energy of the  $1^{A/LS} \rightarrow 1^{A/HS}$  transition on the extent of conversion (sample **3**, the procedure B was applied to extract the heating branches from the  $\chi_M T$  vs.  $T$  curves (see Fig S39)). The solid red line is the value obtained by the model-fitting method (the Avrami equation) from isothermal data. Inset: the Arrhenius plot of isothermal data.



**Table S5.** Sample **3**: Information about thermal cycling, temperatures  $T_c\uparrow$  and  $T_c\downarrow$  (K), hysteresis loop width  $\Delta T$  (K) and kinetic parameters for the LS  $\rightarrow$  HS and the HS  $\rightarrow$  LS transitions (the JMAK model). The spin transition temperatures  $T_c\uparrow$  and  $T_c\downarrow$  were determined in “dynamic” experiments by the maximum value of  $d(\chi_M T)/dT$ ; the temperatures at which kinetic measurements have been done are marked by “kin”. The hysteresis loop widths are given only for the cycles when both heating and cooling were done in the non-isothermal mode.

| sample   | cycle     | day    | $T\uparrow$    | $n$  | $k / s^{-1}$          | $T\downarrow$  | $n$  | $k / s^{-1}$          | $\Delta T$ |
|----------|-----------|--------|----------------|------|-----------------------|----------------|------|-----------------------|------------|
| <b>3</b> | <b>1</b>  | 1st    | <b>ca. 385</b> |      |                       | <b>360 kin</b> | 4.40 | $7.37 \times 10^{-4}$ |            |
|          | <b>2</b>  | 1st    | <b>467 kin</b> | 1.76 | $3.24 \times 10^{-4}$ | <b>370 kin</b> | 3.17 | $1.14 \times 10^{-3}$ |            |
|          | <b>3</b>  | 1st    | <b>467 kin</b> | 1.72 | $8.30 \times 10^{-4}$ | <b>370 kin</b> | 3.52 | $1.00 \times 10^{-3}$ |            |
|          | <b>4</b>  | 4th    | <b>450 kin</b> | 1.73 | $6.08 \times 10^{-4}$ | <b>370 kin</b> | 2.47 | $2.22 \times 10^{-3}$ |            |
|          | <b>5</b>  | 4th    | <b>450 kin</b> | 2.18 | $4.67 \times 10^{-4}$ | <b>370 kin</b> | 2.99 | $1.40 \times 10^{-3}$ |            |
|          | <b>6</b>  | 4th    | <b>467 kin</b> | 2.14 | $1.49 \times 10^{-3}$ | <b>370 kin</b> | 3.10 | $8.13 \times 10^{-4}$ |            |
|          | <b>7</b>  | 9th    | <b>450 kin</b> | 1.77 | $6.60 \times 10^{-4}$ | <b>370 kin</b> | 2.47 | $1.67 \times 10^{-3}$ |            |
|          | <b>8</b>  | 38th   | <b>440 kin</b> | 1.84 | $4.15 \times 10^{-4}$ | <b>370 kin</b> | 1.75 | $2.52 \times 10^{-3}$ |            |
|          | <b>9</b>  | 38th   | <b>467 kin</b> | 1.99 | $1.43 \times 10^{-3}$ | <b>370 kin</b> | 2.68 | $1.11 \times 10^{-3}$ |            |
|          | <b>10</b> | 39th   | <b>464</b>     |      |                       | <b>365</b>     |      |                       | <b>99</b>  |
|          | <b>11</b> | 86th   | <b>450 kin</b> | 1.97 | $6.30 \times 10^{-4}$ | <b>370 kin</b> | 1.69 | $1.77 \times 10^{-3}$ |            |
|          | <b>12</b> | 86th   | <b>450 kin</b> | 2.15 | $1.54 \times 10^{-3}$ | <b>370 kin</b> | 2.00 | $1.64 \times 10^{-3}$ |            |
|          | <b>13</b> | 218th  | <b>466</b>     |      |                       | <b>366</b>     |      |                       | <b>100</b> |
|          | <b>14</b> | 218th  | <b>460</b>     |      |                       | <b>366</b>     |      |                       | <b>94</b>  |
|          | <b>15</b> | 218th  | <b>460</b>     |      |                       | <b>367</b>     |      |                       | <b>93</b>  |
|          | <b>16</b> | 253rd  | <b>450 kin</b> | 2.06 | $7.10 \times 10^{-4}$ | <b>370 kin</b> | 1.46 | $1.17 \times 10^{-3}$ |            |
|          | <b>17</b> | 253rd  | <b>450 kin</b> | 2.08 | $5.66 \times 10^{-4}$ | <b>370 kin</b> | 2.00 | $2.83 \times 10^{-3}$ |            |
|          | <b>18</b> | 1088th | <b>477</b>     |      |                       | <b>362</b>     |      |                       | <b>115</b> |
|          | <b>19</b> | 1088th | <b>467</b>     |      |                       | <b>364</b>     |      |                       | <b>103</b> |
|          | <b>20</b> | 1089th | <b>448</b>     |      |                       | <b>369</b>     |      |                       | <b>79</b>  |
|          | <b>21</b> | 1090th | <b>444</b>     |      |                       | -              |      |                       |            |
|          | <b>22</b> | 1091th | <b>423</b>     |      |                       | -              |      |                       |            |
|          | <b>23</b> | 1092th | <b>430</b>     |      |                       | <b>372</b>     |      |                       | <b>58</b>  |
